# Supplementary material
Source: PubMed Central journal article supplement (PMC3342447)
Supplement: NIHMS362260-supplement-1.pdf [file NIHMS362260-supplement-1.pdf]

Fig S1. Chen et al

- IgG
- Notch3 (Santa Cruz)
- Notch3 (Cell Signaling)

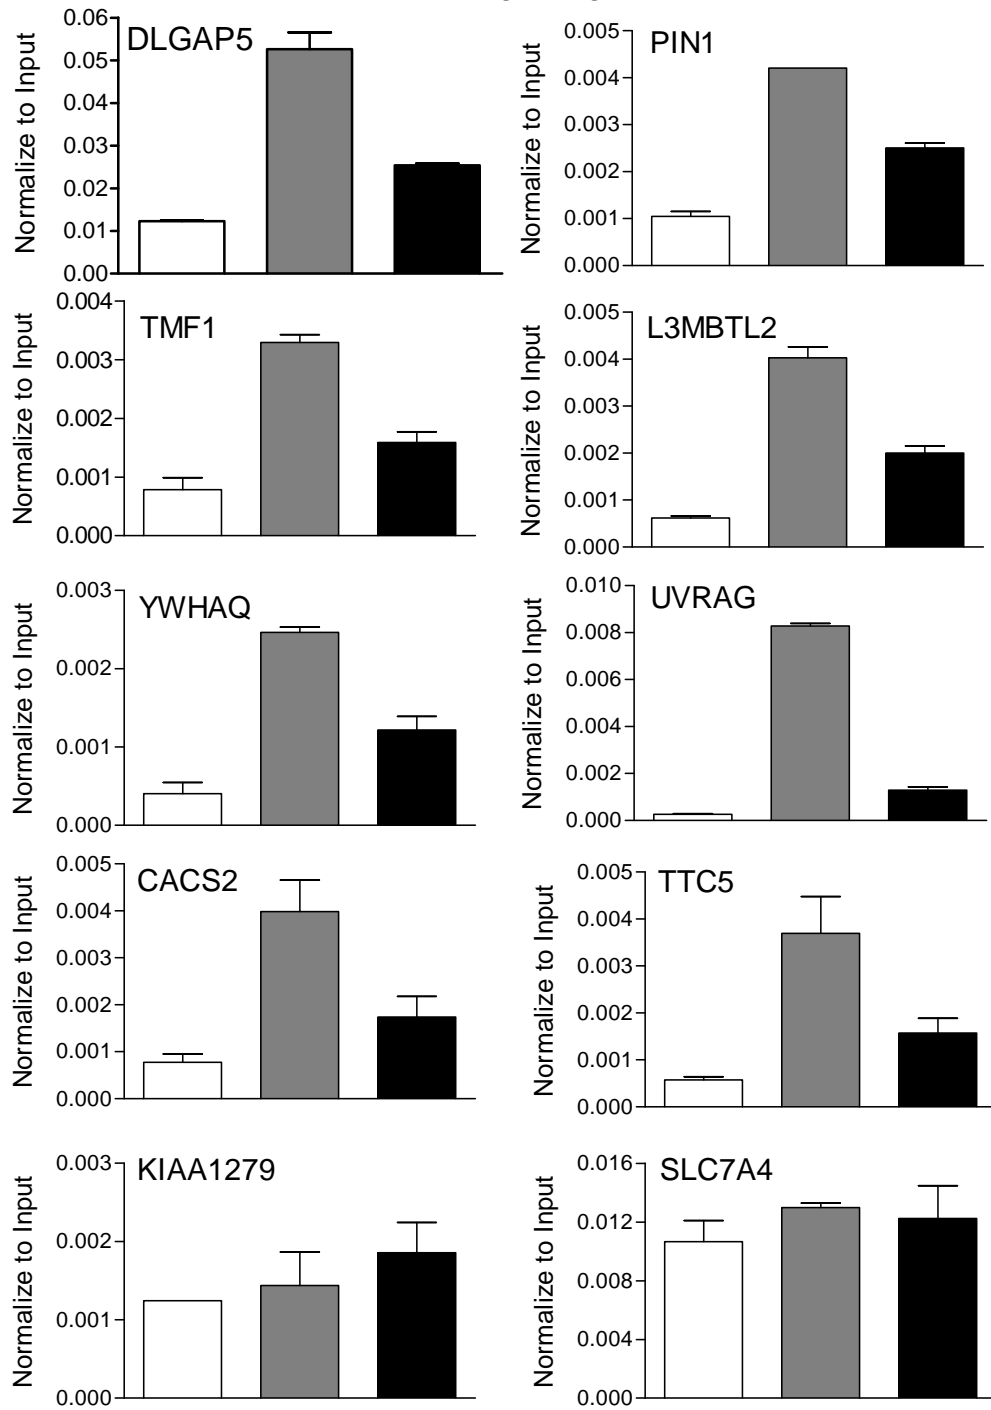

**Fig S1. Validation of ChIP-on-chip study by two different anti-NOTCH3 antibodies.** ChIP was performed using two different anti-NOTCH3 antibodies. qPCR demonstrates an agreement of sequence enrichment using either of the antibodies.

**A**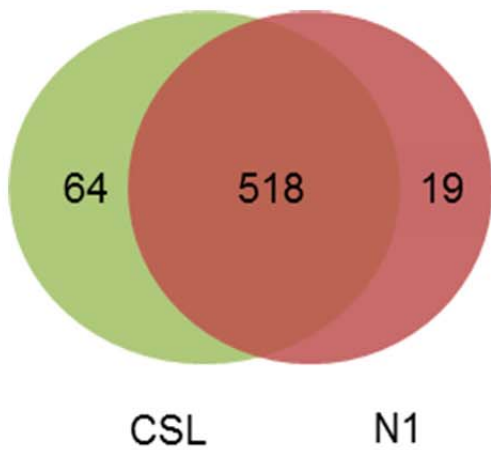**B**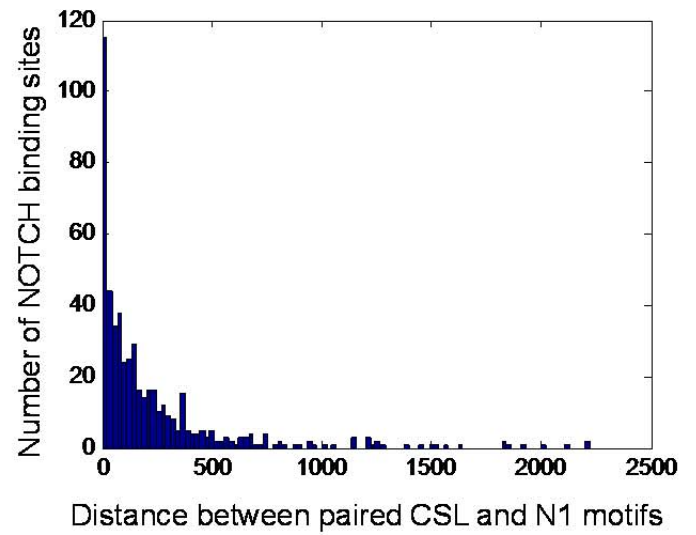

**Fig S2. Events and distribution of canonical CSL and N1 motifs at Notch3-bound promoters.**

- A.** NOTCH3-bound promoter sequences were extracted from the BioMart database (601 sequences available), and were screened for the presence of canonical CSL and N1 motifs.
- B.** Distribution of distance between paired CSL and N1 motifs.

### NOTCH1 ChIP Targets

| Motif Name          | n1B | n2B    | n1C   | n2C      | Enrichment score | p-value (Hypergeometric test) |
|---------------------|-----|--------|-------|----------|------------------|-------------------------------|
| N1 Motif            | 79  | 105000 | 23550 | 50279108 | 1.61             | 3.26e-005                     |
| Canonical CSL Motif | 196 | 105000 | 18681 | 50279108 | 5.02             | <1e-013                       |

### NOTCH3 ChIP Targets

| Motif Name          | n1B | n2B    | n1C   | n2C      | Enrichment score | p-value (Hypergeometric test) |
|---------------------|-----|--------|-------|----------|------------------|-------------------------------|
| N1 Motif            | 125 | 131595 | 23550 | 50279108 | 2.03             | 4.1378e-13                    |
| Canonical CSL Motif | 64  | 131595 | 18681 | 50279108 | 1.31             | 0.0157                        |

n1B: number of occurrence in ChIP-chip bound promoter regions

n2B: total sequence length in ChIP-chip bound promoter regions

n1C: number of occurrence in promoter regions elsewhere

n2C: total sequence length in promoter regions elsewhere

Enrichment score =  $(n1B/n2B)/(n1C/n2C)$

p-value:

$$pvalue = \sum_{i=n1B+1}^{n2B} \binom{n2B}{i} p^i (1-p)^{n2B-i}$$

$$where \quad p = n1C/n2C$$

**Fig S3. De novo motif discovery in Notch1 and Notch3-ChIP targeted promoter sequences.** Motif binding events and sequence length used in determining the enrichment of each motif is shown. Equations for the enrichment score as well as *p* value determined by hypergeometric test are presented.

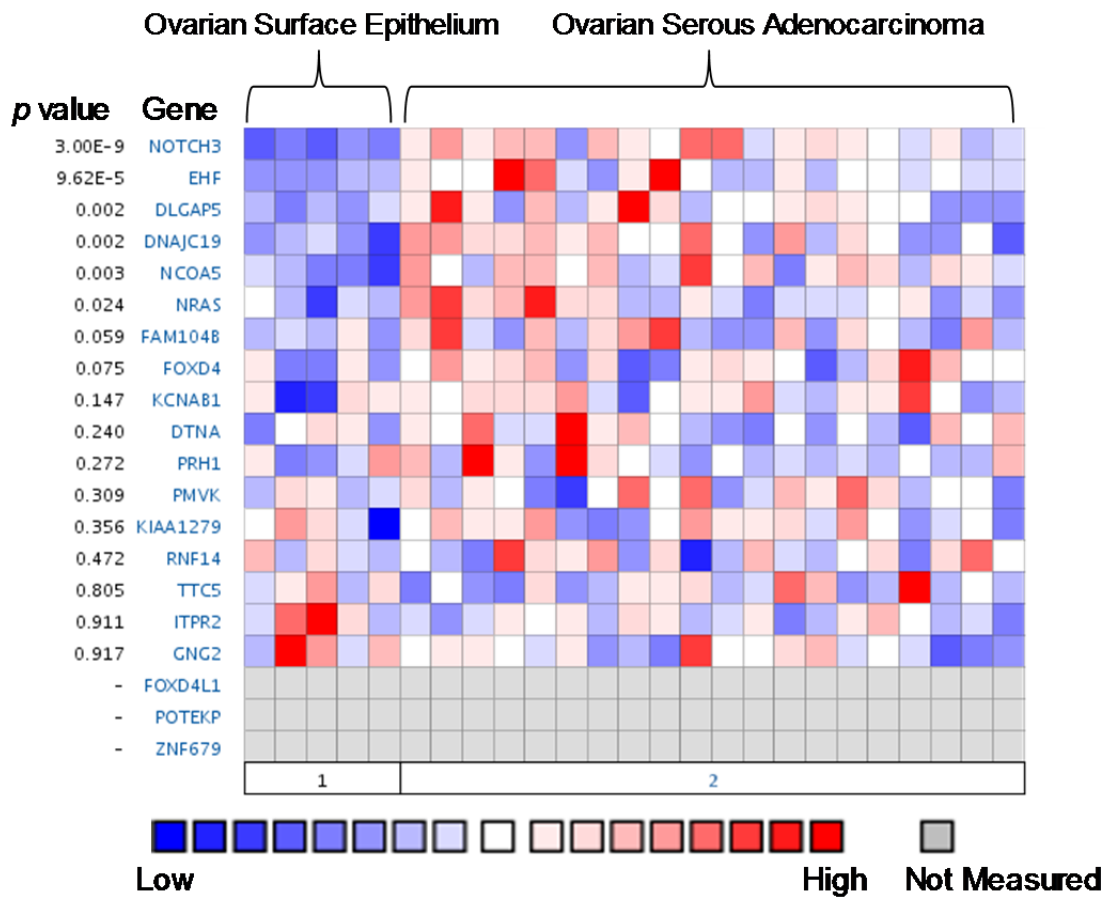

**Fig S4. Expression of NOTCH3-upregulated genes in carcinoma tissues.** Gene expression analysis to determine the co-upregulation of NOTCH3 and its target genes was performed on a previously published dataset<sup>1</sup> using OncoPrint™ web tool (Compendia Bioscience, Ann Arbor, MI). *P* value was determined using Student's *t* test.

<sup>1</sup>Lu KH, Patterson AP, Wang L, Marquez RT, Atkinson EN, et al. (2004) Selection of potential markers for epithelial ovarian cancer with gene expression arrays and recursive descent partition analysis.

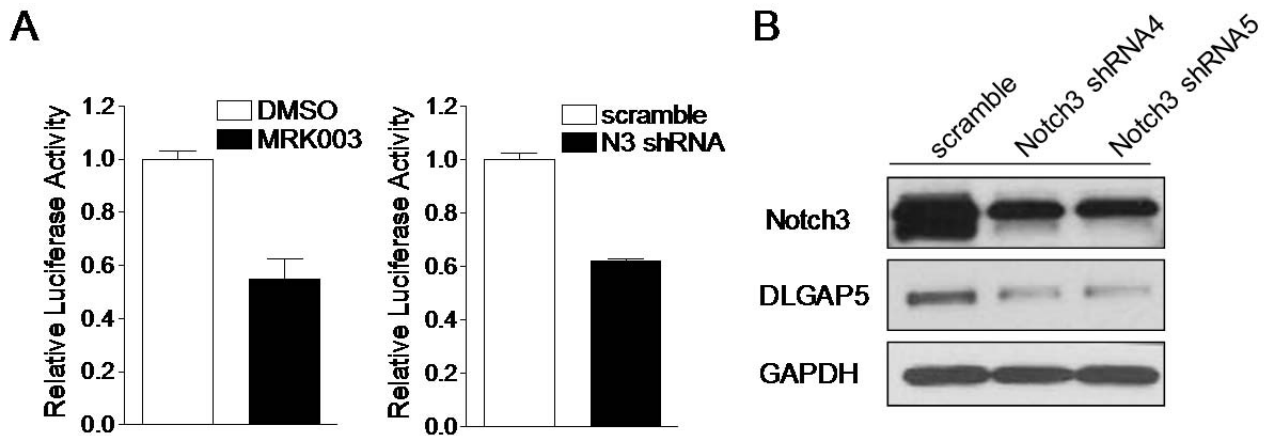

**Fig S5. Regulation of DLGAP5 transcription and protein expression by NOTCH3.** DLGAP5 luciferase reporter activity is suppressed by either MRK-003 or NOTCH3 shRNA in OVCAR3 cells. Luciferase activity was normalized to either DMSO or scrambled shRNA. **B.** NOTCH3 shRNA reduces NOTCH3 protein levels and concomitantly decreases DLGAP5 protein levels in OVCAR3.

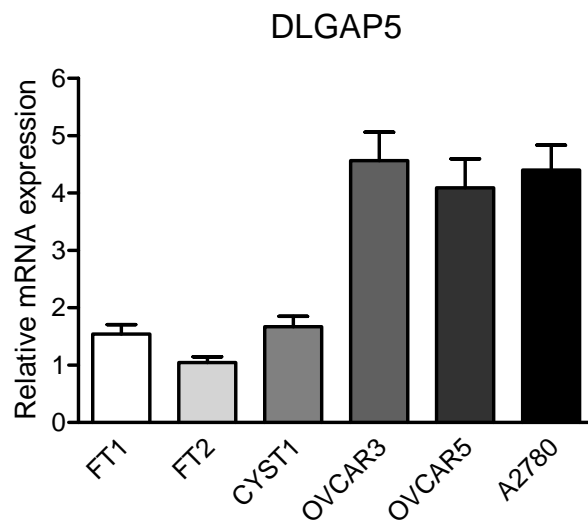

**Fig S6. DLGAP5 expression in three ovarian cancer cell lines.** mRNA expression was determined by quantitative RT-PCR in three ovarian cancer cell lines (OVCAR3, OVCAR5, and A2780). Primary fallopian tube epithelial cell cultures (FT1 and FT2) and a primary benign serous cystadenoma culture (Cyst1) were also analyzed for comparison. In this experiment, expression values were normalized to that of FT2.

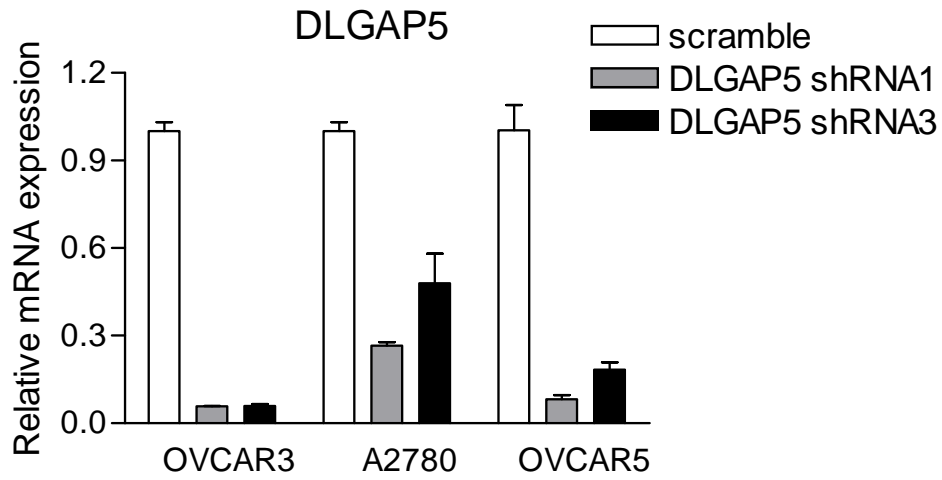

**Fig S7. Knockdown efficiency of DLGAP5 shRNAs.** Both DLGAP5 shRNAs (1 and 3) significantly reduce the level of DLGAP5 transcript expression as compared to scramble shRNA in a panel of ovarian cancer cell lines.

Fig S8.

A

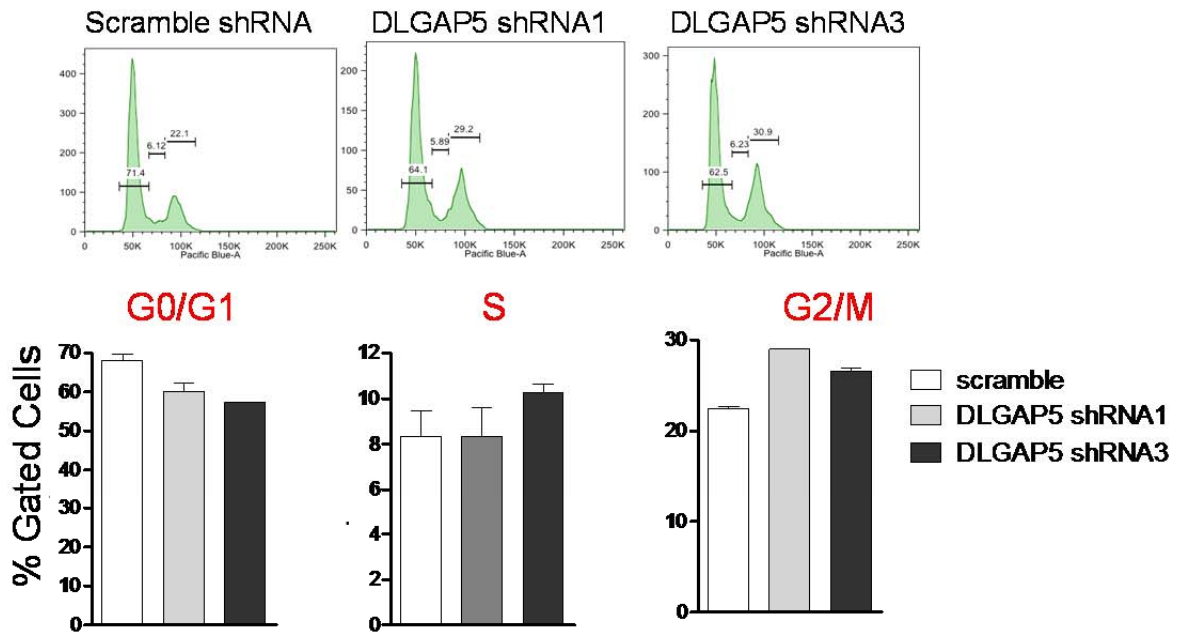

B

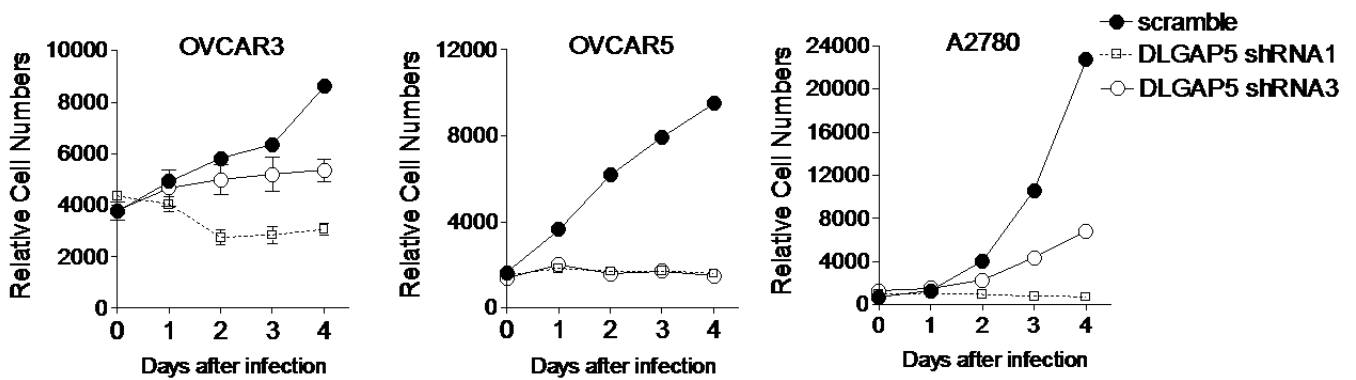

**Fig S8. Knockdown of DLGAP5 leads to cell cycle arrest at the G2/M phase and reduces cellular proliferation. A.** The effects of DLGAP5 shRNAs (shRNA1 and shRNA3) on cell cycle progression in A2780 ovarian cancer cells. Top: representative plots of cell cycle analysis. Bottom: percentage of cells in G0/G1, S, and G2/M phases. Individual viable cells were gated to exclude debris, dead cells, and cell aggregates. Data shown represent mean plus one standard deviation from three replicates. **B.** Growth curve analysis shows a decrease in cell numbers of shRNA-treated OVCAR3, OVCAR5 and A2780 cells as compared to scramble shRNA-treated cells.

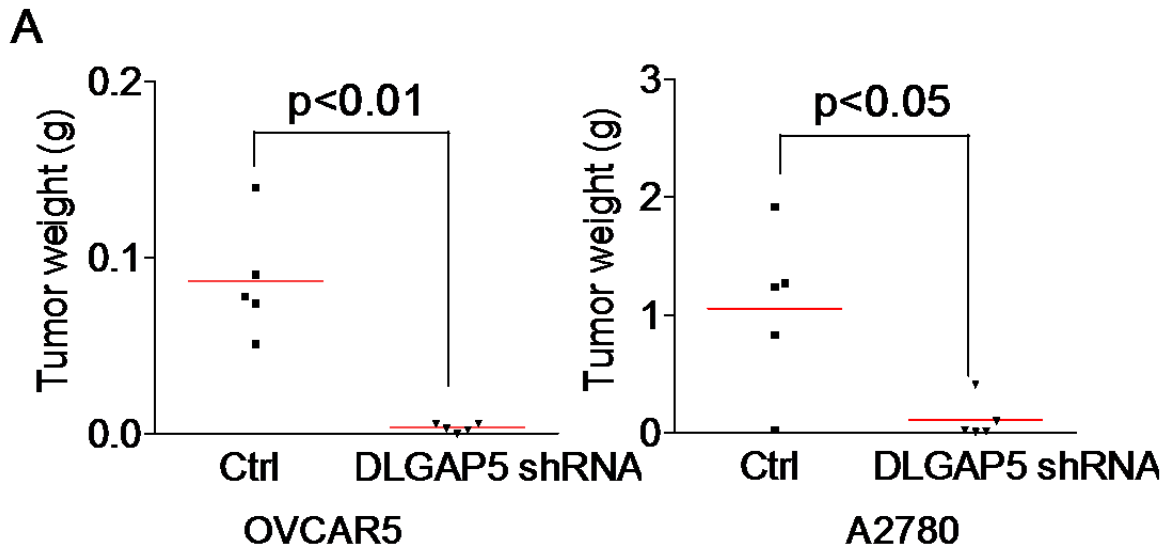

**B**

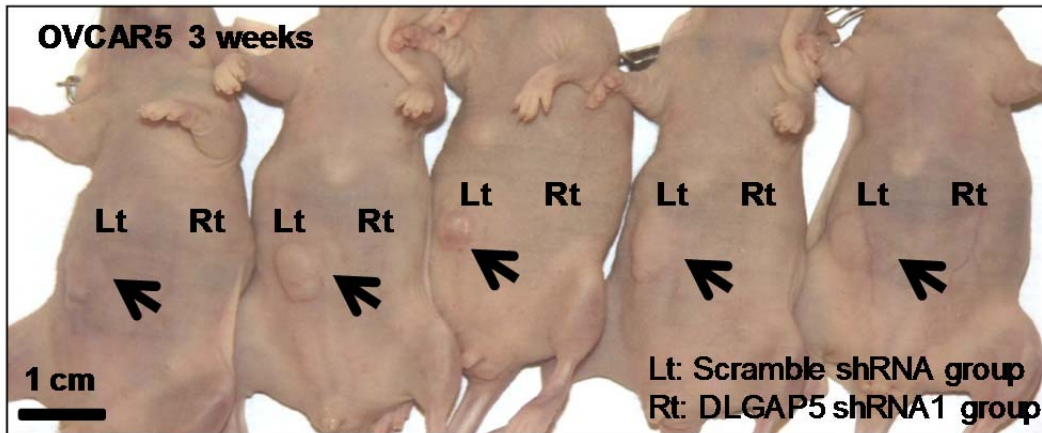

**Fig. S9. Knockdown of DLGAP5 reduces tumorigenicity.** A. Tumor weight was measured in excised OVCAR5 and A2780 subcutaneous tumor xenografts from nude mice. The difference between DLGAP5 and control shRNA-treated groups was determined using Mann-Whitney test. B. Representative photos of mice bearing OVCAR5 subcutaneous tumors in control shRNA group (left flank, Lt); most mice receiving DLGAP5 shRNA treated cells do not develop tumors, or their tumors are very small (right flank, Rt).
