# Supplementary material
Source: PubMed Central journal article supplement (PMC3342447)
Supplement: NIHMS362260-supplement-2.pdf [file NIHMS362260-supplement-2.pdf]

**Table S1. Target DNA fragments Enriched by ChIP-on-chip**

| NAME      | CHROMOSOME   | PEAK_START | PEAK_END  | PEAK_SCORE | p VALUE | GENE ID |
|-----------|--------------|------------|-----------|------------|---------|---------|
| DLGAP5    | chr14        | 54727149   | 54728198  | 3.55       | 0.0000  | 9787    |
| UVRAG     | chr11        | 75201322   | 75204371  | 3.53       | 0.0000  | 7405    |
| LOC158318 | chr9         | 46276027   | 46278076  | 3.05       | 0.0000  | 158318  |
| DOC1      | chr3         | 101315047  | 101316897 | 3.02       | 0.0000  | 11259   |
| TMEM67    | chr8         | 94835620   | 94837069  | 3.02       | 0.0000  | 91147   |
| CHURC1    | chr14        | 64449792   | 64451341  | 2.94       | 0.0000  | 91612   |
| BRIP1     | chr17        | 57296237   | 57297397  | 2.88       | 0.0000  | 83990   |
| NBPF9     | chr1         | 146065183  | 146068277 | 2.82       | 0.0000  | 440670  |
| STOML2    | chr9         | 35092754   | 35094503  | 2.82       | 0.0000  | 30968   |
| REXO1L1   | chr8         | 86761620   | 86764077  | 2.79       | 0.0000  | 254958  |
| SLC7A4    | chr22        | 19717746   | 19718901  | 2.72       | 0.0000  | 6545    |
| PRAMEF1   | chr1         | 12773335   | 12774893  | 2.72       | 0.0000  | 65121   |
| COPZ1     | chr12        | 53003921   | 53004973  | 2.71       | 0.0000  | 22818   |
| CLEC4C    | chr12        | 7793636    | 7795091   | 2.68       | 0.0000  | 170482  |
| HAAO      | chr2         | 42872219   | 42873468  | 2.66       | 0.0000  | 23498   |
| KIAA1279  | chr10        | 70417712   | 70419361  | 2.66       | 0.0000  | 26128   |
| LILRB3    | chr19        | 59419509   | 59421062  | 2.65       | 0.0000  | 11025   |
| NPIP      | chr16        | 14936100   | 14938761  | 2.64       | 0.0000  | 9284    |
| LOC652848 | chr14        | 105875902  | 105879251 | 2.61       | 0.0000  | 652848  |
| PRAMEF5   | chr1         | 13229705   | 13233160  | 2.59       | 0.0000  | 343068  |
| AMY1A     | chr1         | 103999266  | 104000726 | 2.59       | 0.0000  | 276     |
| IFP38     | chr13_random | 36719      | 38168     | 2.59       | 0.0000  | 83880   |
| MGC50273  | chr2         | 132276004  | 132277753 | 2.59       | 0.0000  | 408029  |
| DMWD      | chr19        | 50987700   | 50989149  | 2.56       | 0.0000  | 1762    |
| CDR2L     | chr17        | 70493726   | 70495183  | 2.56       | 0.0000  | 30850   |
| LENG1     | chr19        | 59354458   | 59356307  | 2.55       | 0.0001  | 79165   |
| PRAMEF8   | chr1         | 13262352   | 13264801  | 2.55       | 0.0001  | 391002  |
| MINK1     | chr17        | 4681599    | 4683448   | 2.54       | 0.0001  | 50488   |
| KGFLP1    | chr9         | 46525057   | 46526406  | 2.54       | 0.0001  | 387628  |
| PRAMEF4   | chr1         | 12868313   | 12871162  | 2.54       | 0.0001  | 400735  |
| SF1       | chr11        | 64302419   | 64303974  | 2.54       | 0.0001  | 7536    |
| NBPF10    | chr1         | 16790376   | 16792132  | 2.53       | 0.0001  | 440673  |
| NBPF8     | chr1         | 144768079  | 144770574 | 2.52       | 0.0001  | 641559  |
| GAGE8     | chrX         | 49110914   | 49112466  | 2.52       | 0.0001  | 26749   |
| GPR125    | chr4         | 22128070   | 22129228  | 2.52       | 0.0001  | 166647  |
| AKAP4     | chrX         | 49851849   | 49854799  | 2.51       | 0.0001  | 8852    |
| GAGE5     | chrX         | 49210223   | 49211776  | 2.51       | 0.0001  | 2577    |
| HSPC047   | chr7         | 101907186  | 101908942 | 2.51       | 0.0001  | 29060   |
| ERVK6     | chr7         | 4596243    | 4597295   | 2.50       | 0.0001  | 64006   |
| ZNF287    | chr17        | 16413489   | 16415849  | 2.50       | 0.0001  | 57336   |
| CBWD1     | chr2         | 113911152  | 113912801 | 2.49       | 0.0001  | 55871   |
| USP30     | chr12        | 107973573  | 107975122 | 2.49       | 0.0001  | 84749   |
| CEP152    | chr15        | 46890419   | 46892169  | 2.49       | 0.0001  | 22995   |

|           |              |           |           |      |        |        |
|-----------|--------------|-----------|-----------|------|--------|--------|
| TMOD4     | chr1         | 149415350 | 149416599 | 2.47 | 0.0001 | 29765  |
| GAGE8     | chrX         | 49101292  | 49102944  | 2.47 | 0.0001 | 26749  |
| KATNAL2   | chr18        | 42780684  | 42781741  | 2.47 | 0.0001 | 83473  |
| GCKR      | chr2         | 27572909  | 27574258  | 2.46 | 0.0001 | 2646   |
| NBPF20    | chr1         | 143325415 | 143327275 | 2.45 | 0.0001 | 400818 |
| DUB3      | chr8         | 12032678  | 12034427  | 2.45 | 0.0001 | 377630 |
| OGFR      | chr20        | 60904121  | 60905470  | 2.44 | 0.0001 | 11054  |
| LOC158572 | chrX         | 49530960  | 49533110  | 2.44 | 0.0001 | 158572 |
| PLEKHG5   | chr1         | 6501656   | 6504509   | 2.43 | 0.0001 | 57449  |
| BMP10     | chr2         | 68953153  | 68954802  | 2.43 | 0.0001 | 27302  |
| LOC400986 | chr2         | 95974096  | 95975854  | 2.43 | 0.0001 | 400986 |
| RINT1     | chr7         | 104958586 | 104959936 | 2.43 | 0.0001 | 60561  |
| IL28A     | chr19        | 44448296  | 44449945  | 2.43 | 0.0001 | 282616 |
| LOC389833 | chr21_random | 164870    | 166419    | 2.42 | 0.0001 | 389833 |
| WBSCR19   | chr7         | 44004813  | 44006762  | 2.42 | 0.0001 | 285955 |
| ZNF540    | chr19        | 42731647  | 42732696  | 2.42 | 0.0001 | 163255 |
| FLJ46210  | chr3         | 140246224 | 140247583 | 2.41 | 0.0001 | 389152 |
| SSPN      | chr12        | 26237088  | 26239044  | 2.41 | 0.0001 | 8082   |
| TSHZ3     | chr19        | 36462925  | 36464674  | 2.41 | 0.0001 | 57616  |
| LOC284861 | chr22        | 19864502  | 19868051  | 2.41 | 0.0001 | 284861 |
| FAM105B   | chr5         | 14731548  | 14732797  | 2.40 | 0.0001 | 90268  |
| OSTbeta   | chr15        | 63128009  | 63129165  | 2.40 | 0.0001 | 123264 |
| N/A       | chr17        | 57706770  | 57709419  | 2.39 | 0.0001 |        |
| KIAA1026  | chr1         | 14795299  | 14796352  | 2.39 | 0.0002 | 23254  |
| LRRC32    | chr11        | 76057643  | 76059092  | 2.39 | 0.0002 | 2615   |
| CST11     | chr20        | 23381682  | 23383338  | 2.38 | 0.0002 | 140880 |
| LOC554226 | chr2         | 132636698 | 132638651 | 2.38 | 0.0002 | 554226 |
| PPFIA4    | chr1         | 201286033 | 201287882 | 2.38 | 0.0002 | 8497   |
| PIN1      | chr19        | 9805398   | 9806747   | 2.37 | 0.0002 | 5300   |
| AANAT     | chr17        | 71960783  | 71962334  | 2.37 | 0.0002 | 15     |
| FLJ42289  | chr15        | 98708757  | 98710606  | 2.37 | 0.0002 | 388182 |
| C3orf25   | chr3         | 130629284 | 130631145 | 2.37 | 0.0002 | 90288  |
| SLC35B1   | chr17        | 45141481  | 45142932  | 2.36 | 0.0002 | 10237  |
| FOXD4L4   | chr9         | 69670351  | 69672200  | 2.36 | 0.0002 | 349334 |
| FLJ45445  | chr19        | 152328    | 154488    | 2.36 | 0.0002 | 399844 |
| OR52R1    | chr11        | 4783123   | 4784273   | 2.35 | 0.0002 | 119695 |
| NALP12    | chr19        | 59002971  | 59004420  | 2.35 | 0.0002 | 91662  |
| CCNB3     | chrX         | 50042275  | 50045230  | 2.35 | 0.0002 | 85417  |
| NBPF15    | chr1         | 146826017 | 146828366 | 2.35 | 0.0002 | 284565 |
| N/A       | chr1         | 146712653 | 146715505 | 2.35 | 0.0002 |        |
| ASAP      | chr4         | 156517172 | 156518729 | 2.35 | 0.0002 | 79884  |
| C9orf24   | chr9         | 34372099  | 34373748  | 2.34 | 0.0002 | 84688  |
| RNASE2    | chr14        | 20490969  | 20492118  | 2.34 | 0.0002 | 6036   |
| CDC2L2    | chr1         | 1639829   | 1641387   | 2.34 | 0.0002 | 985    |
| KRT6B     | chr12        | 51131130  | 51132179  | 2.33 | 0.0002 | 3854   |
| C1orf36   | chr1         | 209731982 | 209734031 | 2.33 | 0.0002 | 343035 |
| ATP6VOD2  | chr8         | 87179354  | 87181104  | 2.33 | 0.0002 | 245972 |

|             |       |           |           |      |        |        |
|-------------|-------|-----------|-----------|------|--------|--------|
| PHLDB2      | chr3  | 113084899 | 113086455 | 2.33 | 0.0002 | 90102  |
| LOC401507   | chr9  | 39889344  | 39890493  | 2.32 | 0.0002 | 401507 |
| MGC42630    | chr9  | 67375447  | 67379096  | 2.32 | 0.0002 | 286301 |
| GOLGA8A     | chr15 | 32486180  | 32487629  | 2.32 | 0.0002 | 23015  |
| S100A3      | chr1  | 151789358 | 151791007 | 2.32 | 0.0002 | 6274   |
| DKFZp564N24 | chr7  | 53068442  | 53069797  | 2.31 | 0.0002 | 285877 |
| YWHAQ       | chr2  | 9688657   | 9689717   | 2.31 | 0.0002 | 10971  |
| PRAMEF7     | chr1  | 12897608  | 12899763  | 2.31 | 0.0003 | 441871 |
| CNOT3       | chr19 | 59331060  | 59332409  | 2.31 | 0.0003 | 4849   |
| GPR15       | chr3  | 99732473  | 99733527  | 2.30 | 0.0003 | 2838   |
| RASSF5      | chr1  | 204794534 | 204795983 | 2.30 | 0.0003 | 83593  |
| GSR         | chr8  | 30705826  | 30707279  | 2.30 | 0.0003 | 2936   |
| PEF1        | chr1  | 31883064  | 31884713  | 2.30 | 0.0003 | 553115 |
| LENG8       | chr19 | 59649512  | 59651075  | 2.30 | 0.0003 | 114823 |
| tcag7.1017  | chr7  | 99741960  | 99744109  | 2.30 | 0.0003 | 441272 |
| SHOX2       | chr3  | 159302524 | 159303873 | 2.29 | 0.0003 | 6474   |
| N/A         | chr19 | 11344482  | 11346231  | 2.29 | 0.0003 |        |
| LCE3C       | chr1  | 150839432 | 150840481 | 2.29 | 0.0003 | 353144 |
| RETNLB      | chr3  | 109957820 | 109959569 | 2.29 | 0.0003 | 84666  |
| CSTA        | chr3  | 123526008 | 123527666 | 2.29 | 0.0003 | 1475   |
| MARK2       | chr11 | 63417106  | 63418258  | 2.28 | 0.0003 | 2011   |
| NBPF14      | chr1  | 146491472 | 146493121 | 2.28 | 0.0003 | 25832  |
| MS4A8B      | chr11 | 60222622  | 60224371  | 2.28 | 0.0003 | 83661  |
| SLC35A2     | chrX  | 48654861  | 48656539  | 2.28 | 0.0003 | 7355   |
| PARP15      | chr3  | 123815214 | 123818170 | 2.28 | 0.0003 | 165631 |
| C14orf129   | chr14 | 95913074  | 95914631  | 2.28 | 0.0003 | 51527  |
| PRAMEF9     | chr1  | 13511859  | 13515315  | 2.28 | 0.0003 | 343070 |
| INO80B      | chr2  | 74535353  | 74536702  | 2.28 | 0.0003 | 83444  |
| PMF1        | chr1  | 154446739 | 154448588 | 2.28 | 0.0003 | 11243  |
| EDN3        | chr20 | 57306193  | 57308042  | 2.27 | 0.0003 | 1908   |
| SCYL1       | chr11 | 65046658  | 65048007  | 2.27 | 0.0003 | 57410  |
| OR4X2       | chr11 | 48220531  | 48221580  | 2.26 | 0.0003 | 119764 |
| PSG1        | chr19 | 48075011  | 48076160  | 2.26 | 0.0003 | 5669   |
| LOC205251   | chr2  | 110337606 | 110338667 | 2.26 | 0.0003 | 205251 |
| FOXD4L4     | chr9  | 69668751  | 69670305  | 2.26 | 0.0003 | 349334 |
| SLC41A3     | chr3  | 127286732 | 127288081 | 2.26 | 0.0003 | 54946  |
| CIB4        | chr2  | 26717015  | 26718567  | 2.26 | 0.0004 | 130106 |
| RP11-119E20 | chrX  | 50573984  | 50575833  | 2.25 | 0.0004 | 57477  |
| LOC504188   | chr9  | 45621954  | 45624303  | 2.25 | 0.0004 | 504188 |
| WWC2        | chr4  | 184351461 | 184352710 | 2.25 | 0.0004 | 80014  |
| RP11-561O23 | chr9  | 70104902  | 70108551  | 2.25 | 0.0004 | 286380 |
| IRX1        | chr5  | 3646467   | 3648016   | 2.25 | 0.0004 | 79192  |
| PTAFR       | chr1  | 28376478  | 28377827  | 2.25 | 0.0004 | 5724   |
| FGF23       | chr12 | 4358255   | 4359504   | 2.25 | 0.0004 | 8074   |
| SMURF2      | chr17 | 60089457  | 60090911  | 2.25 | 0.0004 | 64750  |
| KRTAP10-1   | chr21 | 44784906  | 44786455  | 2.25 | 0.0004 | 386677 |
| SHC4        | chr15 | 46954881  | 46956330  | 2.24 | 0.0004 | 399694 |

|             |              |           |           |      |        |        |
|-------------|--------------|-----------|-----------|------|--------|--------|
| EFHC1       | chr6         | 52392670  | 52394019  | 2.24 | 0.0004 | 114327 |
| DEFB108B    | chr11        | 71220497  | 71221954  | 2.24 | 0.0004 | 245911 |
| LAPTM4B     | chr8         | 98855084  | 98856133  | 2.24 | 0.0004 | 55353  |
| KRT6C       | chr12        | 51172240  | 51173589  | 2.24 | 0.0004 | 140446 |
| LILRB1      | chr19        | 59819840  | 59821092  | 2.23 | 0.0004 | 10859  |
| CASC2       | chr10        | 119795994 | 119797643 | 2.23 | 0.0004 | 255082 |
| ALDH3A1     | chr17        | 19593700  | 19594852  | 2.23 | 0.0004 | 218    |
| TBC1D3B     | chr17        | 31527050  | 31529399  | 2.23 | 0.0004 | 414059 |
| K6HF        | chr12        | 51113473  | 51114722  | 2.23 | 0.0004 | 9119   |
| KCNJ9       | chr1         | 158315983 | 158317632 | 2.23 | 0.0004 | 3765   |
| FLJ39257    | chr4         | 4109567   | 4112717   | 2.22 | 0.0004 | 650346 |
| CDK3        | chr17        | 71506913  | 71508162  | 2.22 | 0.0004 | 1018   |
| ERAS        | chrX         | 48571226  | 48572683  | 2.22 | 0.0004 | 3266   |
| MGC50811    | chr2         | 218927322 | 218928678 | 2.22 | 0.0004 | 375307 |
| DKFZP434004 | chr17        | 25908009  | 25909558  | 2.22 | 0.0004 | 26083  |
| MLL3        | chr7         | 151566322 | 151568072 | 2.22 | 0.0004 | 58508  |
| HOXB6       | chr17        | 44038747  | 44039806  | 2.22 | 0.0004 | 3216   |
| RGPD5       | chr2         | 109905023 | 109907072 | 2.22 | 0.0004 | 84220  |
| PKD1L1      | chr7         | 47955962  | 47957111  | 2.22 | 0.0004 | 168507 |
| OR2F1       | chr7         | 143287596 | 143288945 | 2.22 | 0.0005 | 26211  |
| FLJ16478    | chr1         | 155337424 | 155338583 | 2.21 | 0.0005 | 440695 |
| BMP15       | chrX         | 50667823  | 50669482  | 2.21 | 0.0005 | 9210   |
| OR2T5       | chr1         | 246718212 | 246719361 | 2.21 | 0.0005 | 401993 |
| ZNF80       | chr3         | 115440514 | 115441863 | 2.21 | 0.0005 | 7634   |
| FLJ39743    | chr15        | 96874934  | 96876783  | 2.21 | 0.0005 | 283777 |
| RP11-255A11 | chr9         | 33511812  | 33514161  | 2.21 | 0.0005 | 441459 |
| H2AFB1      | chrX         | 153764610 | 153765961 | 2.20 | 0.0005 | 474382 |
| RAB7        | chr3         | 129925268 | 129926317 | 2.20 | 0.0005 | 7879   |
| TBC1D3B     | chr17        | 31615072  | 31617821  | 2.20 | 0.0005 | 414059 |
| IFNA17      | chr9         | 21219723  | 21220783  | 2.20 | 0.0005 | 3451   |
| HSD3B2      | chr1         | 119756695 | 119758044 | 2.20 | 0.0005 | 3284   |
| IFP38       | chr13_random | 35219     | 36368     | 2.20 | 0.0005 | 83880  |
| PDE4DIP     | chr1         | 143787484 | 143788733 | 2.19 | 0.0005 | 9659   |
| CASC4       | chr15        | 42366920  | 42368269  | 2.19 | 0.0005 | 113201 |
| WIPI2       | chr7         | 5219725   | 5221374   | 2.19 | 0.0005 | 26100  |
| UNQ6125     | chr3         | 131244545 | 131245794 | 2.19 | 0.0005 | 442092 |
| TBC1D3      | chr17        | 33601396  | 33603854  | 2.19 | 0.0005 | 84218  |
| TSKU        | chr11        | 76169632  | 76171681  | 2.19 | 0.0005 | 25987  |
| RAB11FIP1   | chr8         | 37849854  | 37851203  | 2.19 | 0.0005 | 80223  |
| ZNF595      | chr4         | 40526     | 42975     | 2.18 | 0.0006 | 152687 |
| KRTAP5-11   | chr11        | 70970569  | 70972629  | 2.18 | 0.0006 | 440051 |
| CLC         | chr19        | 44920408  | 44922957  | 2.18 | 0.0006 | 1178   |
| TTC5        | chr14        | 19842976  | 19844225  | 2.18 | 0.0006 | 91875  |
| FLJ41327    | chr2         | 242616879 | 242618438 | 2.18 | 0.0006 | 401045 |
| GNLY        | chr2         | 85772324  | 85773979  | 2.18 | 0.0006 | 10578  |
| FXYD3       | chr19        | 40295938  | 40297196  | 2.18 | 0.0006 | 5349   |
| AHSG        | chr3         | 187811580 | 187812629 | 2.18 | 0.0006 | 197    |

|           |       |           |           |      |        |        |
|-----------|-------|-----------|-----------|------|--------|--------|
| LOC388692 | chr1  | 147552377 | 147553726 | 2.18 | 0.0006 | 388692 |
| OR2T2     | chr1  | 246680121 | 246681677 | 2.17 | 0.0006 | 401992 |
| TMF1      | chr3  | 69183927  | 69185280  | 2.17 | 0.0006 | 7110   |
| GPHA2     | chr11 | 64460136  | 64461592  | 2.17 | 0.0006 | 170589 |
| LOC650293 | chr4  | 9093711   | 9095570   | 2.17 | 0.0006 | 650293 |
| CHRNA6    | chr8  | 42741776  | 42743029  | 2.17 | 0.0006 | 8973   |
| YWHAQ     | chr2  | 9689871   | 9691220   | 2.17 | 0.0006 | 10971  |
| CD200R1   | chr3  | 114177832 | 114179290 | 2.17 | 0.0006 | 131450 |
| N/A       | chr5  | 43161850  | 43163006  | 2.17 | 0.0006 |        |
| SLC4A8    | chr12 | 50103060  | 50104309  | 2.17 | 0.0006 | 9498   |
| CTSK      | chr1  | 149047736 | 149050099 | 2.16 | 0.0006 | 1513   |
| SLC5A10   | chr17 | 18792017  | 18793366  | 2.16 | 0.0006 | 125206 |
| ATP2B2    | chr3  | 10468146  | 10469200  | 2.16 | 0.0006 | 491    |
| FAM99A    | chr11 | 1640972   | 1642221   | 2.16 | 0.0006 | 387742 |
| KRT6E     | chr12 | 51152826  | 51153975  | 2.16 | 0.0006 | 286887 |
| ZNF536    | chr19 | 35552467  | 35554716  | 2.16 | 0.0006 | 9745   |
| RSHL3     | chr6  | 117043959 | 117045308 | 2.16 | 0.0006 | 345895 |
| OR6N1     | chr1  | 157002096 | 157003745 | 2.16 | 0.0006 | 128372 |
| AHRR      | chr5  | 355990    | 357339    | 2.16 | 0.0006 | 57491  |
| RPL29     | chr3  | 52005398  | 52006447  | 2.16 | 0.0007 | 6159   |
| OR4F17    | chr19 | 61481     | 62530     | 2.15 | 0.0007 | 81099  |
| FRG1      | chr4  | 191097267 | 191098816 | 2.15 | 0.0007 | 2483   |
| FOXD4L1   | chr2  | 113970530 | 113974079 | 2.15 | 0.0007 | 200350 |
| ZNF747    | chr16 | 30454899  | 30456048  | 2.15 | 0.0007 | 65988  |
| C10orf129 | chr10 | 96942146  | 96943704  | 2.15 | 0.0007 | 142827 |
| CSNK1D    | chr17 | 77826162  | 77827311  | 2.15 | 0.0007 | 1453   |
| DUX1      | chr10 | 135339156 | 135341421 | 2.15 | 0.0007 | 26584  |
| TRIM42    | chr3  | 141878170 | 141879727 | 2.15 | 0.0007 | 287015 |
| Rgr       | chr22 | 22362747  | 22363996  | 2.15 | 0.0007 | 266747 |
| FLJ40296  | chr13 | 56610952  | 56612701  | 2.15 | 0.0007 | 122183 |
| UGCGL1    | chr2  | 128562554 | 128564203 | 2.15 | 0.0007 | 56886  |
| OR2M2     | chr1  | 246407810 | 246410863 | 2.15 | 0.0007 | 391194 |
| NBPF4     | chr1  | 108587196 | 108588645 | 2.15 | 0.0007 | 148545 |
| TPD52L3   | chr9  | 6316509   | 6318266   | 2.15 | 0.0007 | 89882  |
| C17orf47  | chr17 | 53975682  | 53977534  | 2.14 | 0.0007 | 284083 |
| TSPYL2    | chrX  | 53125886  | 53127635  | 2.14 | 0.0007 | 64061  |
| C7orf29   | chr7  | 149655370 | 149657119 | 2.14 | 0.0007 | 113763 |
| LOC349114 | chr7  | 39796524  | 39798073  | 2.14 | 0.0007 | 349114 |
| LBP       | chr20 | 36405998  | 36407451  | 2.14 | 0.0007 | 3929   |
| EIF4A1    | chr17 | 7414167   | 7415416   | 2.14 | 0.0007 | 1973   |
| HRASLS2   | chr11 | 63086431  | 63087480  | 2.14 | 0.0007 | 54979  |
| CBWD3     | chr9  | 70044104  | 70045860  | 2.14 | 0.0007 | 445571 |
| CRYBA4    | chr22 | 25345591  | 25346940  | 2.14 | 0.0007 | 1413   |
| LOC128192 | chr1  | 45226043  | 45227492  | 2.13 | 0.0007 | 128192 |
| OLFM1     | chr9  | 137104391 | 137105540 | 2.13 | 0.0007 | 10439  |
| GPR128    | chr3  | 101809434 | 101810983 | 2.13 | 0.0007 | 84873  |
| LOC390980 | chr19 | 62454114  | 62455571  | 2.13 | 0.0008 | 390980 |

|           |       |           |           |      |        |        |
|-----------|-------|-----------|-----------|------|--------|--------|
| NUDT10    | chrX  | 51089222  | 51091578  | 2.13 | 0.0008 | 170685 |
| GAB2      | chr11 | 77729574  | 77730833  | 2.13 | 0.0008 | 9846   |
| SGEF      | chr3  | 155320499 | 155321648 | 2.13 | 0.0008 | 26084  |
| PRAMEF10  | chr1  | 12881975  | 12883333  | 2.13 | 0.0008 | 343071 |
| KRTAP19-4 | chr21 | 30790799  | 30792460  | 2.12 | 0.0008 | 337971 |
| PSG5      | chr19 | 48384486  | 48385842  | 2.12 | 0.0008 | 5673   |
| GRHL1     | chr2  | 10017744  | 10019694  | 2.12 | 0.0008 | 29841  |
| SCGB1C1   | chr11 | 180379    | 181934    | 2.12 | 0.0008 | 147199 |
| TMCO5     | chr15 | 36014448  | 36015605  | 2.12 | 0.0008 | 145942 |
| EPN2      | chr17 | 19079702  | 19080851  | 2.12 | 0.0008 | 22905  |
| CBWD5     | chr9  | 69728927  | 69730576  | 2.12 | 0.0008 | 220869 |
| HAAO      | chr2  | 42873919  | 42875182  | 2.12 | 0.0008 | 23498  |
| EHF       | chr11 | 34598943  | 34600192  | 2.12 | 0.0008 | 26298  |
| IQSEC3    | chr12 | 54602     | 56651     | 2.11 | 0.0008 | 440073 |
| KRTAP10-9 | chr21 | 44868867  | 44870117  | 2.11 | 0.0008 | 386676 |
| OR11H12   | chr14 | 18446293  | 18448342  | 2.11 | 0.0008 | 440153 |
| KRTHB4    | chr12 | 51064684  | 51066233  | 2.11 | 0.0008 | 3890   |
| LOC441426 | chr9  | 42355698  | 42356759  | 2.11 | 0.0008 | 441426 |
| TGM4      | chr3  | 44889430  | 44890979  | 2.11 | 0.0009 | 7047   |
| MAGEH1    | chrX  | 55492562  | 55494318  | 2.11 | 0.0009 | 28986  |
| MAP4      | chr3  | 47928107  | 47929457  | 2.11 | 0.0009 | 4134   |
| PPIAL4    | chr1  | 146421043 | 146422492 | 2.11 | 0.0009 | 164022 |
| ZNF364    | chr1  | 144323292 | 144324341 | 2.10 | 0.0009 | 27246  |
| ORM2      | chr9  | 116129289 | 116130939 | 2.10 | 0.0009 | 5005   |
| LOC163131 | chr19 | 45249579  | 45250734  | 2.10 | 0.0009 | 163131 |
| ZIC4      | chr3  | 148606097 | 148607146 | 2.10 | 0.0009 | 84107  |
| OR1S1     | chr11 | 57738192  | 57739741  | 2.10 | 0.0009 | 219959 |
| CDK2AP2   | chr11 | 67032378  | 67033827  | 2.10 | 0.0009 | 10263  |
| PITPNM1   | chr11 | 67032678  | 67033827  | 2.10 | 0.0009 | 9600   |
| STX12     | chr1  | 27967420  | 27968775  | 2.10 | 0.0009 | 23673  |
| CDK4      | chr12 | 56432531  | 56434283  | 2.09 | 0.0009 | 1019   |
| FLJ45832  | chr20 | 28136074  | 28137523  | 2.09 | 0.0009 | 400841 |
| SLC7A10   | chr19 | 38410070  | 38411125  | 2.09 | 0.0009 | 56301  |
| C16orf5   | chr16 | 4504957   | 4506013   | 2.09 | 0.0009 | 29965  |
| ZNF550    | chr19 | 62758537  | 62759586  | 2.09 | 0.0009 | 162972 |
| RIT1      | chr1  | 154148754 | 154150410 | 2.09 | 0.0009 | 6016   |
| RAB41     | chrX  | 69416092  | 69417242  | 2.09 | 0.0009 | 347517 |
| SPATA2    | chr20 | 47965875  | 47967435  | 2.09 | 0.0009 | 9825   |
| LOC349196 | chr8  | 7108028   | 7109677   | 2.09 | 0.0010 | 349196 |
| BLCAP     | chr20 | 35590917  | 35592366  | 2.09 | 0.0010 | 10904  |
| EID-3     | chr19 | 44715434  | 44717983  | 2.09 | 0.0010 | 126272 |
| HSPA6     | chr1  | 159758259 | 159760108 | 2.09 | 0.0010 | 3310   |
| KIR2DL4   | chr19 | 60005780  | 60007829  | 2.09 | 0.0010 | 3805   |
| CBWD1     | chr9  | 70045911  | 70047665  | 2.09 | 0.0010 | 55871  |
| GALIG     | chr14 | 54671451  | 54673200  | 2.09 | 0.0010 | 81625  |
| UGT1A1    | chr2  | 234330957 | 234332316 | 2.09 | 0.0010 | 54658  |
| PSMD12    | chr17 | 62793883  | 62795335  | 2.09 | 0.0010 | 5718   |

|              |             |           |           |      |        |        |
|--------------|-------------|-----------|-----------|------|--------|--------|
| FOXD4        | chr9        | 107419    | 110787    | 2.08 | 0.0010 | 2298   |
| OR4D1        | chr17       | 53584813  | 53586369  | 2.08 | 0.0010 | 26689  |
| SLC1A7       | chr1        | 53382337  | 53383488  | 2.08 | 0.0010 | 6512   |
| RP6-166C19.1 | chrX        | 119899597 | 119901354 | 2.08 | 0.0010 | 255313 |
| LRRC35       | chr11       | 120398639 | 120400188 | 2.08 | 0.0010 | 219899 |
| KIAA0355     | chr19       | 39479820  | 39481378  | 2.08 | 0.0010 | 9710   |
| LOC389834    | chr4_random | 736850    | 738504    | 2.08 | 0.0010 | 389834 |
| SLC7A14      | chr3        | 171788152 | 171789214 | 2.08 | 0.0010 | 57709  |
| PJCG6        | chr8        | 7092384   | 7095133   | 2.08 | 0.0010 | 645642 |
| SLA          | chr8        | 134142528 | 134144177 | 2.08 | 0.0010 | 6503   |
| FLJ43390     | chr14       | 61667229  | 61668688  | 2.07 | 0.0010 | 646113 |
| FAM38B       | chr18       | 10687814  | 10689263  | 2.07 | 0.0011 | 63895  |
| PPP1R3F      | chrX        | 49011360  | 49013109  | 2.07 | 0.0011 | 89801  |
| NCOA5        | chr20       | 44151787  | 44153042  | 2.07 | 0.0011 | 57727  |
| SPANXC       | chrX        | 140163312 | 140164961 | 2.07 | 0.0011 | 64663  |
| MGC5242      | chr7        | 134506809 | 134508266 | 2.07 | 0.0011 | 78996  |
| MMP21        | chr10       | 127454580 | 127455637 | 2.07 | 0.0011 | 118856 |
| BACE2        | chr21       | 41458897  | 41460146  | 2.07 | 0.0011 | 25825  |
| OR6A2        | chr11       | 6772715   | 6773964   | 2.07 | 0.0011 | 8590   |
| OR2W3        | chr1        | 246125211 | 246126360 | 2.07 | 0.0011 | 343171 |
| C10orf26     | chr10       | 104523795 | 104524847 | 2.07 | 0.0011 | 54838  |
| TR2IT1       | chr3        | 127809488 | 127810748 | 2.07 | 0.0011 | 645840 |
| OR5K4        | chr3        | 99555302  | 99556351  | 2.06 | 0.0011 | 403278 |
| LOC644808    | chr1        | 45081503  | 45083084  | 2.06 | 0.0011 | 644808 |
| CYP3A4       | chr7        | 99220544  | 99222096  | 2.06 | 0.0011 | 1576   |
| CYP4F11      | chr19       | 15907926  | 15908975  | 2.06 | 0.0011 | 57834  |
| MGC34761     | chr16       | 68763428  | 68764477  | 2.06 | 0.0011 | 283971 |
| STRC         | chr15       | 41698090  | 41699539  | 2.06 | 0.0011 | 161497 |
| FSD2         | chr15       | 81272082  | 81273538  | 2.06 | 0.0011 | 123722 |
| GDPD4        | chr11       | 76675311  | 76677260  | 2.06 | 0.0011 | 220032 |
| ISGF3G       | chr14       | 23698271  | 23699520  | 2.06 | 0.0011 | 10379  |
| NP           | chr14       | 20006204  | 20007853  | 2.06 | 0.0011 | 4860   |
| C21orf124    | chr21       | 43970710  | 43971859  | 2.06 | 0.0011 | 85006  |
| OCM          | chr7        | 97458252  | 97459501  | 2.06 | 0.0011 | 4951   |
| DEFB123      | chr20       | 29489571  | 29491320  | 2.05 | 0.0012 | 245936 |
| ANKFN1       | chr17       | 51583134  | 51585083  | 2.05 | 0.0012 | 162282 |
| NRAS         | chr1        | 115061960 | 115063616 | 2.05 | 0.0012 | 4893   |
| PARP6        | chr15       | 70347623  | 70348774  | 2.05 | 0.0012 | 56965  |
| LCE2A        | chr1        | 150934763 | 150936123 | 2.05 | 0.0012 | 353139 |
| LOC441956    | chr21       | 13976034  | 13977983  | 2.05 | 0.0012 | 441956 |
| LOC90925     | chr14       | 106332337 | 106333396 | 2.05 | 0.0012 | 90925  |
| CBWD1        | chr9        | 169932    | 171481    | 2.05 | 0.0012 | 55871  |
| ARMC7        | chr17       | 70616476  | 70617725  | 2.05 | 0.0012 | 79637  |
| LOC653107    | chr10       | 47873130  | 47874579  | 2.05 | 0.0012 | 653107 |
| LG MN        | chr14       | 92285465  | 92286626  | 2.04 | 0.0012 | 5641   |
| ALKBH6       | chr19       | 41198495  | 41199544  | 2.04 | 0.0012 | 84964  |
| HCLS1        | chr3        | 122861405 | 122864462 | 2.04 | 0.0012 | 3059   |

|             |              |           |           |      |        |        |
|-------------|--------------|-----------|-----------|------|--------|--------|
| GOLGA8B     | chr15        | 32612503  | 32613564  | 2.04 | 0.0012 | 440270 |
| FBXO40      | chr3         | 122792653 | 122793710 | 2.04 | 0.0013 | 51725  |
| LOC401622   | chrX         | 154234751 | 154235900 | 2.04 | 0.0013 | 401622 |
| LOC389833   | chr4_random  | 555387    | 556449    | 2.04 | 0.0013 | 389833 |
| FCRL1       | chr1         | 156057615 | 156058678 | 2.04 | 0.0013 | 115350 |
| ERVK6       | chr7         | 4597647   | 4598896   | 2.04 | 0.0013 | 64006  |
| EHMT1       | chr9         | 139724437 | 139726187 | 2.04 | 0.0013 | 79813  |
| FLJ45508    | chr12        | 105376712 | 105378561 | 2.04 | 0.0013 | 643721 |
| PFDN5       | chr12        | 51974383  | 51975532  | 2.04 | 0.0013 | 5204   |
| CDRT4       | chr17        | 15310650  | 15312199  | 2.03 | 0.0013 | 284040 |
| ASPH        | chr8         | 62766141  | 62767590  | 2.03 | 0.0013 | 444    |
| PSG9        | chr19        | 48465020  | 48466069  | 2.03 | 0.0013 | 5678   |
| OR1G1       | chr17        | 2977295   | 2978844   | 2.03 | 0.0013 | 8390   |
| VWF         | chr12        | 6104297   | 6105546   | 2.03 | 0.0013 | 7450   |
| RP11-262H14 | chr9         | 41944931  | 41946190  | 2.03 | 0.0013 | 389741 |
| VAR5        | chr6         | 31872922  | 31874071  | 2.03 | 0.0013 | 7407   |
| SIRT7       | chr17        | 77469732  | 77471281  | 2.03 | 0.0013 | 51547  |
| DLEC1       | chr3         | 38054199  | 38056050  | 2.03 | 0.0014 | 9940   |
| ZFP42       | chr4         | 189151218 | 189152767 | 2.03 | 0.0014 | 132625 |
| LOC440348   | chr16        | 72967172  | 72969521  | 2.03 | 0.0014 | 440348 |
| KRTHB6      | chr12        | 50980715  | 50982464  | 2.03 | 0.0014 | 3892   |
| PRAMEF10    | chr1         | 12880375  | 12881440  | 2.02 | 0.0014 | 343071 |
| DYRK4       | chr12        | 4566904   | 4568754   | 2.02 | 0.0014 | 8798   |
| ITPR2       | chr12        | 26878498  | 26879947  | 2.02 | 0.0014 | 3709   |
| BMS1L       | chr10        | 42598064  | 42599213  | 2.02 | 0.0014 | 9790   |
| C6orf65     | chr6         | 56925346  | 56926396  | 2.02 | 0.0014 | 221336 |
| THAP3       | chr1         | 6605738   | 6607394   | 2.02 | 0.0014 | 90326  |
| CACNG5      | chr17        | 62301212  | 62302361  | 2.02 | 0.0014 | 27091  |
| C1orf14     | chr1         | 181190082 | 181191731 | 2.02 | 0.0014 | 81626  |
| IGFL3       | chr19        | 51319077  | 51320226  | 2.02 | 0.0014 | 388555 |
| C1orf136    | chr1         | 229900430 | 229901879 | 2.02 | 0.0014 | 400574 |
| NDUFA9      | chr12        | 4626504   | 4627857   | 2.02 | 0.0014 | 4704   |
| USP6        | chr17        | 4971310   | 4973359   | 2.02 | 0.0014 | 9098   |
| WDFY3       | chr4         | 86038399  | 86039648  | 2.02 | 0.0014 | 23001  |
| LOC389832   | chr21_random | 1206276   | 1208025   | 2.01 | 0.0015 | 389832 |
| PSMB9       | chr6         | 32927215  | 32928664  | 2.01 | 0.0015 | 5698   |
| CBWD2       | chr2         | 113909352 | 113910716 | 2.01 | 0.0015 | 150472 |
| FLJ45340    | chr7         | 128081832 | 128083281 | 2.01 | 0.0015 | 402483 |
| TXNDC6      | chr3         | 139530518 | 139532267 | 2.01 | 0.0015 | 347736 |
| LILRA2      | chr19        | 59774370  | 59776720  | 2.01 | 0.0015 | 11027  |
| FLJ16171    | chr5         | 174355940 | 174356989 | 2.01 | 0.0015 | 441116 |
| DSG2        | chr18        | 27329502  | 27330668  | 2.01 | 0.0015 | 1829   |
| ZBTB7B      | chr1         | 153251147 | 153252396 | 2.01 | 0.0015 | 51043  |
| TAS2R41     | chr7         | 142883387 | 142884636 | 2.01 | 0.0015 | 259287 |
| RBP2        | chr3         | 140679442 | 140680498 | 2.01 | 0.0015 | 5948   |
| TAS2R43     | chr12        | 11136295  | 11137454  | 2.01 | 0.0015 | 259289 |
| ABHD14A     | chr3         | 51984366  | 51985715  | 2.01 | 0.0015 | 25864  |



|           |       |           |           |      |        |        |
|-----------|-------|-----------|-----------|------|--------|--------|
| GOLT1A    | chr1  | 202451343 | 202452402 | 2.01 | 0.0015 | 127845 |
| B3GALT3   | chr3  | 162288944 | 162290001 | 2.01 | 0.0015 | 8706   |
| RNF190    | chr17 | 58239927  | 58241276  | 2.01 | 0.0015 | 162333 |
| LOC90925  | chr14 | 106329937 | 106331886 | 2.01 | 0.0015 | 90925  |
| CTAGE6    | chr7  | 142977511 | 142978667 | 2.01 | 0.0015 | 340307 |
| TES       | chr7  | 115635316 | 115636375 | 2.00 | 0.0015 | 26136  |
| C3orf56   | chr3  | 128393263 | 128394512 | 2.00 | 0.0016 | 285311 |
| PARP14    | chr3  | 123900159 | 123901218 | 2.00 | 0.0016 | 54625  |
| XAGE1     | chrX  | 52551264  | 52552425  | 2.00 | 0.0016 | 9503   |
| LOC153561 | chr5  | 69234358  | 69236007  | 2.00 | 0.0016 | 153561 |
| SPDYA     | chr2  | 28892166  | 28893222  | 2.00 | 0.0016 | 245711 |
| OR5L1     | chr11 | 55332818  | 55334367  | 2.00 | 0.0016 | 219437 |
| EPPB9     | chr17 | 19212651  | 19214102  | 2.00 | 0.0016 | 27077  |
| DEFB109   | chr8  | 7892053   | 7893702   | 2.00 | 0.0016 | 641517 |
| LOC129530 | chr2  | 99283974  | 99285423  | 2.00 | 0.0016 | 129530 |
| PTPRS     | chr19 | 5238199   | 5239848   | 2.00 | 0.0016 | 5802   |
| GNAS      | chr20 | 56845689  | 56847438  | 1.99 | 0.0016 | 2778   |
| DTNB      | chr2  | 25751007  | 25752558  | 1.99 | 0.0016 | 1838   |
| RYR1      | chr19 | 43613679  | 43614728  | 1.99 | 0.0017 | 6261   |
| FCRL2     | chr1  | 156004939 | 156006188 | 1.99 | 0.0017 | 79368  |
| TAS2R4    | chr7  | 141124057 | 141125706 | 1.99 | 0.0017 | 50832  |
| CHR415SYT | chr4  | 68611010  | 68612163  | 1.99 | 0.0017 | 401135 |
| LILRA1    | chr19 | 59795424  | 59796973  | 1.99 | 0.0017 | 11024  |
| AVIL      | chr12 | 56496371  | 56498420  | 1.99 | 0.0017 | 10677  |
| PLGLB2    | chr2  | 87826220  | 87827375  | 1.99 | 0.0017 | 5342   |
| LOC388503 | chr19 | 10011655  | 10012904  | 1.99 | 0.0017 | 388503 |
| OMP       | chr11 | 76490133  | 76491282  | 1.98 | 0.0017 | 4975   |
| RAB40B    | chr17 | 78250041  | 78251796  | 1.98 | 0.0017 | 10966  |
| ACCN1     | chr17 | 28644719  | 28646468  | 1.98 | 0.0017 | 40     |
| GPR133    | chr12 | 130003389 | 130005038 | 1.98 | 0.0017 | 283383 |
| MGC72104  | chr20 | 28223839  | 28225288  | 1.98 | 0.0017 | 284802 |
| BPIL2     | chr22 | 31184573  | 31185722  | 1.98 | 0.0017 | 254240 |
| UCN       | chr2  | 27385358  | 27386907  | 1.98 | 0.0017 | 7349   |
| SPRYD5    | chr11 | 55409831  | 55410981  | 1.98 | 0.0017 | 84767  |
| TEX101    | chr19 | 48582402  | 48583453  | 1.98 | 0.0018 | 83639  |
| TOP1MT    | chr8  | 144489426 | 144490481 | 1.98 | 0.0018 | 116447 |
| PDCD6     | chr5  | 322438    | 323595    | 1.98 | 0.0018 | 10016  |
| APEX2     | chrX  | 55040804  | 55042153  | 1.98 | 0.0018 | 27301  |
| DNAH9     | chr17 | 11439972  | 11441428  | 1.98 | 0.0018 | 1770   |
| ZNF683    | chr1  | 26572053  | 26573802  | 1.98 | 0.0018 | 257101 |
| LENG12    | chr19 | 59737281  | 59740030  | 1.98 | 0.0018 | 90011  |
| PSG6      | chr19 | 48113150  | 48114499  | 1.97 | 0.0018 | 5675   |
| CD80      | chr3  | 120761039 | 120762288 | 1.97 | 0.0018 | 941    |
| OR2T29    | chr1  | 246788497 | 246789746 | 1.97 | 0.0018 | 343563 |
| SLC22A12  | chr11 | 64112257  | 64113808  | 1.97 | 0.0018 | 116085 |
| RGPD2     | chr2  | 86995548  | 86997005  | 1.97 | 0.0018 | 440872 |
| NEK11     | chr3  | 132225716 | 132226765 | 1.97 | 0.0018 | 79858  |

|             |       |           |           |      |        |        |
|-------------|-------|-----------|-----------|------|--------|--------|
| CHRNA1      | chr2  | 175337016 | 175338565 | 1.97 | 0.0018 | 1134   |
| SLA2        | chr20 | 34708572  | 34709721  | 1.97 | 0.0019 | 84174  |
| RIMBP2      | chr12 | 129569763 | 129571012 | 1.97 | 0.0019 | 23504  |
| POU5F1      | chr6  | 31246438  | 31247687  | 1.97 | 0.0019 | 5460   |
| C3orf34     | chr3  | 197921928 | 197922984 | 1.97 | 0.0019 | 84984  |
| ZNF236      | chr18 | 72665003  | 72666057  | 1.97 | 0.0019 | 7776   |
| S100A8      | chr1  | 151630573 | 151631628 | 1.97 | 0.0019 | 6279   |
| HSD11B1     | chr1  | 207944513 | 207945662 | 1.97 | 0.0019 | 3290   |
| PRAMEF2     | chr1  | 12838427  | 12840286  | 1.97 | 0.0019 | 65122  |
| KIAA1641    | chr2  | 97494244  | 97495597  | 1.97 | 0.0019 | 57730  |
| CCDC45      | chr17 | 59934225  | 59935377  | 1.96 | 0.0019 | 90799  |
| LOC284323   | chr19 | 45281491  | 45283440  | 1.96 | 0.0019 | 284323 |
| TNFRSF10C   | chr8  | 23013678  | 23014739  | 1.96 | 0.0019 | 8794   |
| OR4N4       | chr15 | 19881336  | 19882807  | 1.96 | 0.0019 | 283694 |
| PCMTD2      | chr20 | 62354864  | 62355913  | 1.96 | 0.0019 | 55251  |
| NOL1        | chr12 | 6548941   | 6550190   | 1.96 | 0.0019 | 4839   |
| H1FOO       | chr3  | 130743547 | 130744596 | 1.96 | 0.0019 | 132243 |
| SP7         | chr12 | 52016604  | 52018467  | 1.96 | 0.0019 | 121340 |
| HIPK4       | chr19 | 45586934  | 45587983  | 1.96 | 0.0020 | 147746 |
| ACTBL1      | chr22 | 14666937  | 14668086  | 1.96 | 0.0020 | 23784  |
| FLJ25773    | chr14 | 98246902  | 98248551  | 1.96 | 0.0020 | 283598 |
| GRK7        | chr3  | 142978740 | 142979889 | 1.96 | 0.0020 | 131890 |
| RAB7L1      | chr1  | 204011750 | 204012901 | 1.96 | 0.0020 | 8934   |
| PARS2       | chr1  | 55002875  | 55004126  | 1.96 | 0.0020 | 25973  |
| LOC653107   | chr10 | 46594428  | 46596277  | 1.96 | 0.0020 | 653107 |
| PCK1        | chr20 | 55567642  | 55568991  | 1.96 | 0.0020 | 5105   |
| SLA         | chr8  | 134140628 | 134141778 | 1.96 | 0.0020 | 6503   |
| SEMA4G      | chr10 | 102720875 | 102722924 | 1.96 | 0.0020 | 57715  |
| C5orf4      | chr5  | 154181679 | 154183128 | 1.96 | 0.0020 | 10826  |
| RP11-130N24 | chrX  | 74062511  | 74063860  | 1.96 | 0.0020 | 340533 |
| FCGR2C      | chr1  | 159816153 | 159817205 | 1.96 | 0.0020 | 9103   |
| ITIH4       | chr3  | 52838734  | 52839783  | 1.96 | 0.0020 | 3700   |
| KARCA1      | chr1  | 159333477 | 159334530 | 1.95 | 0.0020 | 126823 |
| AVPR1B      | chr1  | 204389066 | 204390128 | 1.95 | 0.0020 | 553    |
| CEP192      | chr18 | 12996598  | 12998447  | 1.95 | 0.0020 | 55125  |
| DEFA3       | chr8  | 6863926   | 6865875   | 1.95 | 0.0020 | 1668   |
| ISL1        | chr5  | 50712425  | 50713474  | 1.95 | 0.0020 | 3670   |
| RGN         | chrX  | 46821718  | 46822768  | 1.95 | 0.0020 | 9104   |
| EPAS1       | chr2  | 46375366  | 46376725  | 1.95 | 0.0021 | 2034   |
| LOC642759   | chr10 | 127572897 | 127574653 | 1.95 | 0.0021 | 642759 |
| LPP         | chr3  | 189410714 | 189412070 | 1.95 | 0.0021 | 4026   |
| GPR37L1     | chr1  | 200356451 | 200357500 | 1.95 | 0.0021 | 9283   |
| ORM1        | chr9  | 116124056 | 116126105 | 1.95 | 0.0021 | 5004   |
| PAPPA2      | chr1  | 174696229 | 174697581 | 1.95 | 0.0021 | 60676  |
| GRK1        | chr13 | 113367594 | 113369043 | 1.95 | 0.0021 | 6011   |
| RP11-196G18 | chr1  | 148050138 | 148051187 | 1.95 | 0.0021 | 440689 |
| FLJ43763    | chr6  | 148012    | 149061    | 1.95 | 0.0021 | 642316 |

|           |              |           |           |      |        |        |
|-----------|--------------|-----------|-----------|------|--------|--------|
| LOC653540 | chr17        | 17082421  | 17083870  | 1.95 | 0.0021 | 653540 |
| OR4K15    | chr14        | 19513321  | 19514375  | 1.94 | 0.0021 | 81127  |
| FCGR2B    | chr1         | 159897564 | 159899219 | 1.94 | 0.0021 | 2213   |
| FOXR2     | chrX         | 55663857  | 55665011  | 1.94 | 0.0021 | 139628 |
| OBP2B     | chr9         | 135075849 | 135077098 | 1.94 | 0.0021 | 29989  |
| CORT      | chr1         | 10430657  | 10431715  | 1.94 | 0.0022 | 1325   |
| IFI27     | chr14        | 93644531  | 93645586  | 1.94 | 0.0022 | 3429   |
| OR5M3     | chr11        | 55993549  | 55994705  | 1.94 | 0.0022 | 219482 |
| KRTAP9-4  | chr17        | 36658972  | 36660421  | 1.94 | 0.0022 | 85280  |
| MS4A3     | chr11        | 59579515  | 59580678  | 1.94 | 0.0022 | 932    |
| HRASLS2   | chr11        | 63087831  | 63089080  | 1.94 | 0.0022 | 54979  |
| TAS2R5    | chr7         | 141133785 | 141134934 | 1.94 | 0.0022 | 54429  |
| FBXO25    | chr8         | 344107    | 345863    | 1.94 | 0.0022 | 26260  |
| C20orf108 | chr20        | 54366028  | 54367285  | 1.94 | 0.0022 | 116151 |
| OR2T11    | chr1         | 246856052 | 246857301 | 1.94 | 0.0022 | 127077 |
| ZNHIT2    | chr11        | 64642246  | 64643595  | 1.94 | 0.0022 | 741    |
| ADAM21    | chr14        | 69993869  | 69994923  | 1.94 | 0.0022 | 8747   |
| SLC43A3   | chr11        | 56950099  | 56951148  | 1.93 | 0.0022 | 29015  |
| KEL       | chr7         | 142371125 | 142372274 | 1.93 | 0.0022 | 3792   |
| DKK4      | chr8         | 42352931  | 42353980  | 1.93 | 0.0022 | 27121  |
| CSH2      | chr17        | 59303921  | 59305270  | 1.93 | 0.0022 | 1443   |
| ALAS2     | chrX         | 55074636  | 55076685  | 1.93 | 0.0022 | 212    |
| PDE6C     | chr10        | 95360634  | 95362189  | 1.93 | 0.0023 | 5146   |
| CFTR      | chr7         | 116905452 | 116907101 | 1.93 | 0.0023 | 1080   |
| TASP1     | chr20        | 13568250  | 13569999  | 1.93 | 0.0023 | 55617  |
| TSGA13    | chr7         | 130021046 | 130022400 | 1.93 | 0.0023 | 114960 |
| CHRFAM7A  | chr15        | 28474456  | 28475505  | 1.93 | 0.0023 | 89832  |
| OR4C12    | chr11        | 49959613  | 49961065  | 1.93 | 0.0023 | 283093 |
| LOC402110 | chr4         | 48996533  | 48997682  | 1.93 | 0.0023 | 402110 |
| KRTAP12-2 | chr21        | 44910272  | 44912221  | 1.93 | 0.0023 | 353323 |
| MGC70870  | chr17_random | 115257    | 116412    | 1.93 | 0.0023 | 403340 |
| AP2M1     | chr3         | 185372827 | 185374176 | 1.93 | 0.0023 | 1173   |
| ARNTL2    | chr12        | 27375654  | 27377303  | 1.93 | 0.0023 | 56938  |
| TUFT1     | chr1         | 149776804 | 149777853 | 1.93 | 0.0023 | 7286   |
| HSH2D     | chr19        | 16103337  | 16104486  | 1.93 | 0.0023 | 84941  |
| C12orf10  | chr12        | 51978748  | 51980497  | 1.93 | 0.0023 | 60314  |
| ChGn      | chr8         | 19583374  | 19584525  | 1.93 | 0.0023 | 55790  |
| C20orf59  | chr20        | 61051803  | 61053352  | 1.93 | 0.0023 | 63910  |
| GOLGA8A   | chr15        | 32488480  | 32489829  | 1.93 | 0.0023 | 23015  |
| FLJ45202  | chr9         | 65234068  | 65235118  | 1.93 | 0.0023 | 401508 |
| C1orf158  | chr1         | 12727949  | 12729598  | 1.93 | 0.0023 | 93190  |
| SPANXA1   | chrX         | 140499502 | 140501151 | 1.92 | 0.0024 | 30014  |
| LOC400968 | chr15        | 19617021  | 19618082  | 1.92 | 0.0024 | 400968 |
| EFCAB3    | chr17        | 57809945  | 57810994  | 1.92 | 0.0024 | 146779 |
| OR7C2     | chr19        | 14913100  | 14914249  | 1.92 | 0.0024 | 26658  |
| REP15     | chr12        | 27739894  | 27740943  | 1.92 | 0.0024 | 387849 |
| PAGE2     | chrX         | 55130644  | 55131803  | 1.92 | 0.0024 | 203569 |

|              |       |           |           |      |        |        |
|--------------|-------|-----------|-----------|------|--------|--------|
| NUDT9        | chr4  | 88560558  | 88562207  | 1.92 | 0.0024 | 53343  |
| KCNAB1       | chr3  | 157340944 | 157342398 | 1.92 | 0.0024 | 7881   |
| C1orf55      | chr1  | 224253355 | 224254904 | 1.92 | 0.0024 | 163859 |
| DEFA1        | chr8  | 6862526   | 6863575   | 1.92 | 0.0024 | 1667   |
| SPANXD       | chrX  | 140613364 | 140614713 | 1.92 | 0.0024 | 64648  |
| TCL6         | chr14 | 95198345  | 95199398  | 1.92 | 0.0024 | 27004  |
| FLJ45831     | chr17 | 14636725  | 14637776  | 1.92 | 0.0024 | 400576 |
| ZNF485       | chr10 | 43419180  | 43420329  | 1.92 | 0.0024 | 220992 |
| OR2AG2       | chr11 | 6747064   | 6748526   | 1.92 | 0.0024 | 338755 |
| FLJ34931     | chr2  | 29149631  | 29151480  | 1.92 | 0.0024 | 388939 |
| DOCK1        | chr10 | 128656454 | 128657806 | 1.92 | 0.0025 | 1793   |
| C8orf16      | chr8  | 11024655  | 11026104  | 1.92 | 0.0025 | 83735  |
| MGAM         | chr7  | 141340747 | 141341897 | 1.92 | 0.0025 | 8972   |
| CPNE1        | chr20 | 33705945  | 33706997  | 1.92 | 0.0025 | 8904   |
| SPRYD3       | chr12 | 51760605  | 51761860  | 1.92 | 0.0025 | 84926  |
| KCNJ2        | chr17 | 65674570  | 65675627  | 1.91 | 0.0025 | 3759   |
| CYS1         | chr2  | 10138213  | 10139470  | 1.91 | 0.0025 | 192668 |
| UGT1A6       | chr2  | 234263559 | 234264608 | 1.91 | 0.0025 | 54578  |
| Rgr          | chr22 | 22360547  | 22361896  | 1.91 | 0.0025 | 266747 |
| CASP14       | chr19 | 15023919  | 15024969  | 1.91 | 0.0025 | 23581  |
| PSG7         | chr19 | 48132430  | 48133881  | 1.91 | 0.0025 | 5676   |
| KCTD14       | chr11 | 77411934  | 77413296  | 1.91 | 0.0026 | 65987  |
| DEFB118      | chr20 | 29419088  | 29420237  | 1.91 | 0.0026 | 117285 |
| MOBP         | chr3  | 39483788  | 39485037  | 1.91 | 0.0026 | 4336   |
| NDN          | chr15 | 21483343  | 21485092  | 1.91 | 0.0026 | 4692   |
| SLC15A2      | chr3  | 123095176 | 123096233 | 1.91 | 0.0026 | 6565   |
| KRTAP10-8    | chr21 | 44855423  | 44856472  | 1.91 | 0.0026 | 386681 |
| CXorf23      | chrX  | 19893845  | 19894901  | 1.91 | 0.0026 | 256643 |
| ZNF679       | chr7  | 63324086  | 63325137  | 1.91 | 0.0026 | 168417 |
| ENPEP        | chr4  | 111616573 | 111617722 | 1.90 | 0.0026 | 2028   |
| DPP6         | chr7  | 153212751 | 153214303 | 1.90 | 0.0026 | 1804   |
| ECM1         | chr1  | 148744506 | 148745755 | 1.90 | 0.0026 | 1893   |
| C3orf37      | chr3  | 130478373 | 130479422 | 1.90 | 0.0027 | 56941  |
| ATP1A3       | chr19 | 47191422  | 47192471  | 1.90 | 0.0027 | 478    |
| TIE1         | chr1  | 43536550  | 43537709  | 1.90 | 0.0027 | 7075   |
| OR4X1        | chr11 | 48241088  | 48242637  | 1.90 | 0.0027 | 390113 |
| TEX9         | chr15 | 54444845  | 54445900  | 1.90 | 0.0027 | 374618 |
| PPAPDC1A     | chr10 | 122204079 | 122205241 | 1.90 | 0.0027 | 196051 |
| PYHIN1       | chr1  | 157165373 | 157166522 | 1.90 | 0.0027 | 149628 |
| NAT8         | chr2  | 73723235  | 73724688  | 1.90 | 0.0027 | 9027   |
| PTPRZ1       | chr7  | 121297942 | 121298993 | 1.90 | 0.0027 | 5803   |
| GPR89A       | chr1  | 145864437 | 145865587 | 1.90 | 0.0027 | 51463  |
| C14orf32     | chr14 | 54585553  | 54586802  | 1.90 | 0.0027 | 93487  |
| IFNA21       | chr9  | 21157725  | 21159187  | 1.90 | 0.0027 | 3452   |
| OTOA         | chr16 | 21623684  | 21624733  | 1.89 | 0.0028 | 146183 |
| RP11-145H9.1 | chr6  | 2697753   | 2698813   | 1.89 | 0.0028 | 340156 |
| N/A          | chr3  | 110539283 | 110540941 | 1.89 | 0.0028 |        |

|           |       |           |           |      |        |        |
|-----------|-------|-----------|-----------|------|--------|--------|
| LOC220594 | chr17 | 18364745  | 18367504  | 1.89 | 0.0028 | 220594 |
| C21orf33  | chr21 | 44376323  | 44377479  | 1.89 | 0.0028 | 8209   |
| CML2      | chr2  | 73782875  | 73784524  | 1.89 | 0.0028 | 51471  |
| CBWD1     | chr9  | 168032    | 169081    | 1.89 | 0.0028 | 55871  |
| KRTAP19-5 | chr21 | 30795379  | 30796728  | 1.89 | 0.0028 | 337972 |
| PCBP3     | chr21 | 46091602  | 46093166  | 1.89 | 0.0028 | 54039  |
| WFDC3     | chr20 | 43853282  | 43854431  | 1.89 | 0.0028 | 140686 |
| CXCL11    | chr4  | 77176057  | 77177113  | 1.89 | 0.0028 | 6373   |
| FLJ42291  | chr7  | 152743281 | 152744630 | 1.89 | 0.0029 | 346547 |
| WHSC1     | chr4  | 1871950   | 1873108   | 1.89 | 0.0029 | 7468   |
| SPRYD5    | chr11 | 55407731  | 55409591  | 1.89 | 0.0029 | 84767  |
| OR5B21    | chr11 | 58033454  | 58034603  | 1.89 | 0.0029 | 219968 |
| C21orf100 | chr21 | 28832712  | 28834261  | 1.89 | 0.0029 | 118421 |
| ZFP106    | chr15 | 40537119  | 40538368  | 1.88 | 0.0029 | 64397  |
| TCEAL3    | chrX  | 102747789 | 102748845 | 1.88 | 0.0029 | 85012  |
| CLCN5     | chrX  | 49719395  | 49720746  | 1.88 | 0.0029 | 1184   |
| CHIA      | chr1  | 111634306 | 111635555 | 1.88 | 0.0029 | 27159  |
| N/A       | chr22 | 40270310  | 40271359  | 1.88 | 0.0029 |        |
| AMY1A     | chr1  | 104093363 | 104094820 | 1.88 | 0.0029 | 276    |
| XAGE3     | chrX  | 52912057  | 52913313  | 1.88 | 0.0030 | 170626 |
| KCNAB1    | chr3  | 157319541 | 157320790 | 1.88 | 0.0030 | 7881   |
| ZNF642    | chr1  | 40715788  | 40716843  | 1.88 | 0.0030 | 339559 |
| CHRD1     | chrX  | 109926949 | 109928305 | 1.88 | 0.0030 | 91851  |
| FLJ12331  | chr16 | 67624989  | 67626338  | 1.88 | 0.0030 | 80052  |
| KRTAP12-1 | chr21 | 44925706  | 44927256  | 1.88 | 0.0030 | 353332 |
| KGFLP1    | chr9  | 42010877  | 42012026  | 1.88 | 0.0030 | 387628 |
| FLJ20160  | chr2  | 191008864 | 191009916 | 1.88 | 0.0030 | 54842  |
| IL1F6     | chr2  | 113479719 | 113480868 | 1.88 | 0.0030 | 27179  |
| WFDC9     | chr20 | 43692321  | 43693370  | 1.88 | 0.0030 | 259240 |
| KRTAP10-3 | chr21 | 44803571  | 44804720  | 1.87 | 0.0031 | 386682 |
| PCDHGB7   | chr5  | 140778020 | 140779172 | 1.87 | 0.0031 | 56099  |
| CNGA3     | chr2  | 98352231  | 98353789  | 1.87 | 0.0031 | 1261   |
| ALS2CR11  | chr2  | 202193643 | 202194700 | 1.87 | 0.0031 | 151254 |
| OR3A1     | chr17 | 3141726   | 3142775   | 1.87 | 0.0031 | 4994   |
| MFSD7     | chr4  | 673680    | 675231    | 1.87 | 0.0031 | 84179  |
| BIRC1     | chr5  | 70355279  | 70356328  | 1.87 | 0.0031 | 4671   |
| ECHS1     | chr10 | 135037499 | 135038548 | 1.87 | 0.0031 | 1892   |
| TUBB4Q    | chr4  | 191143220 | 191144882 | 1.87 | 0.0031 | 56604  |
| FKSG30    | chr2  | 132099963 | 132101112 | 1.87 | 0.0031 | 440915 |
| CCDC37    | chr3  | 127594071 | 127595720 | 1.87 | 0.0031 | 348807 |
| DNAI1     | chr9  | 34448810  | 34449860  | 1.87 | 0.0031 | 27019  |
| INE1      | chrX  | 46947888  | 46948937  | 1.87 | 0.0031 | 8552   |
| H2AFB2    | chrX  | 154262029 | 154263082 | 1.87 | 0.0031 | 474381 |
| FLJ35220  | chr17 | 76001461  | 76002510  | 1.87 | 0.0031 | 284131 |
| EFCAB1    | chr8  | 49811944  | 49812993  | 1.87 | 0.0031 | 79645  |
| SELV      | chr19 | 44696230  | 44697279  | 1.87 | 0.0031 | 348303 |
| FLJ10847  | chr17 | 19375158  | 19376215  | 1.87 | 0.0031 | 55244  |

|           |              |           |           |      |        |        |
|-----------|--------------|-----------|-----------|------|--------|--------|
| MYADM     | chr19        | 59060222  | 59061271  | 1.87 | 0.0032 | 91663  |
| LOC643367 | chr5         | 69009942  | 69011291  | 1.87 | 0.0032 | 643367 |
| ASB12     | chrX         | 63361328  | 63362377  | 1.87 | 0.0032 | 142689 |
| HAX1      | chr1         | 152509468 | 152510517 | 1.87 | 0.0032 | 10456  |
| MBP       | chr18        | 72975262  | 72976319  | 1.87 | 0.0032 | 4155   |
| ANXA8     | chr10        | 47214967  | 47216316  | 1.86 | 0.0032 | 244    |
| OR52W1    | chr11        | 6174729   | 6175884   | 1.86 | 0.0032 | 120787 |
| LOC440157 | chr14        | 18753981  | 18755030  | 1.86 | 0.0032 | 440157 |
| PLIN      | chr15        | 88024995  | 88026253  | 1.86 | 0.0032 | 5346   |
| TXNRD2    | chr22        | 18305103  | 18306456  | 1.86 | 0.0032 | 10587  |
| OR5D16    | chr11        | 55360203  | 55361258  | 1.86 | 0.0033 | 390144 |
| OAZ3      | chr1         | 150005464 | 150006613 | 1.86 | 0.0033 | 51686  |
| IFNA5     | chr9         | 21295555  | 21296607  | 1.86 | 0.0033 | 3442   |
| CDRT15    | chr17        | 14079975  | 14081324  | 1.86 | 0.0033 | 146822 |
| SLC26A10  | chr12        | 56298559  | 56300208  | 1.86 | 0.0033 | 65012  |
| PRKACG    | chr9         | 70820128  | 70821277  | 1.86 | 0.0033 | 5568   |
| PHC3      | chr3         | 171382310 | 171383663 | 1.86 | 0.0034 | 80012  |
| FLJ40244  | chr17        | 18484846  | 18485895  | 1.86 | 0.0034 | 254272 |
| ERN1      | chr17        | 59561908  | 59562959  | 1.86 | 0.0034 | 2081   |
| LOC126248 | chr19        | 38313574  | 38314923  | 1.86 | 0.0034 | 126248 |
| TMCC1     | chr3         | 130890772 | 130891828 | 1.85 | 0.0034 | 23023  |
| SPAG11    | chr8         | 7307802   | 7309160   | 1.85 | 0.0034 | 10407  |
| ZDHHC11   | chr5         | 905701    | 906750    | 1.85 | 0.0034 | 79844  |
| LOC440888 | chr2         | 91492189  | 91493838  | 1.85 | 0.0034 | 440888 |
| SLC31A2   | chr9         | 114951221 | 114952370 | 1.85 | 0.0034 | 1318   |
| NXF2      | chrX         | 101613388 | 101614440 | 1.85 | 0.0034 | 56001  |
| RIBC1     | chrX         | 53466763  | 53467814  | 1.85 | 0.0034 | 158787 |
| HECA      | chr6         | 139495441 | 139496790 | 1.85 | 0.0034 | 51696  |
| GPR151    | chr5         | 145874869 | 145875918 | 1.85 | 0.0034 | 134391 |
| YBX1      | chr1         | 42920613  | 42921662  | 1.85 | 0.0034 | 4904   |
| LILRA4    | chr19        | 59543445  | 59544694  | 1.85 | 0.0034 | 23547  |
| KIR2DL5A  | chr19_random | 228379    | 229434    | 1.85 | 0.0035 | 57292  |
| DTNA      | chr18        | 30543933  | 30544982  | 1.85 | 0.0035 | 1837   |
| GPR109B   | chr12        | 121766697 | 121767746 | 1.85 | 0.0035 | 8843   |
| NALP7     | chr19        | 60150079  | 60151228  | 1.85 | 0.0035 | 199713 |
| NAT10     | chr11        | 34081424  | 34082573  | 1.85 | 0.0035 | 55226  |
| RBP2      | chr3         | 140677342 | 140678391 | 1.85 | 0.0035 | 5948   |
| OR1N2     | chr9         | 124352969 | 124354625 | 1.85 | 0.0035 | 138882 |
| SLC4A1    | chr17        | 39701993  | 39703043  | 1.85 | 0.0035 | 6521   |
| MYT1      | chr20        | 62265270  | 62266519  | 1.85 | 0.0035 | 4661   |
| ROPN1     | chr3         | 125192189 | 125193247 | 1.85 | 0.0035 | 54763  |
| PLG       | chr6         | 161040972 | 161042432 | 1.85 | 0.0035 | 5340   |
| N/A       | chr19        | 42357073  | 42358125  | 1.85 | 0.0035 |        |
| MGC70870  | chr17_random | 116757    | 117906    | 1.85 | 0.0035 | 403340 |
| FLJ25084  | chr2         | 70044401  | 70045550  | 1.85 | 0.0035 | 151516 |
| FAM12A    | chr14        | 20281238  | 20283401  | 1.85 | 0.0035 | 10876  |
| FLJ38451  | chr19        | 40142044  | 40143193  | 1.85 | 0.0035 | 126375 |

|           |       |           |           |      |        |        |
|-----------|-------|-----------|-----------|------|--------|--------|
| VPS41     | chr7  | 38874473  | 38875527  | 1.85 | 0.0035 | 27072  |
| P2RY6     | chr11 | 72651817  | 72652866  | 1.85 | 0.0035 | 5031   |
| GH2       | chr17 | 59312255  | 59313604  | 1.85 | 0.0035 | 2689   |
| LQK1      | chr1  | 211095919 | 211097776 | 1.85 | 0.0035 | 642946 |
| CXorf44   | chrX  | 55205434  | 55206985  | 1.85 | 0.0035 | 90736  |
| ADAM12    | chr10 | 128068455 | 128069604 | 1.85 | 0.0035 | 8038   |
| DCTN1     | chr2  | 74456287  | 74457536  | 1.85 | 0.0035 | 1639   |
| ITGA2B    | chr17 | 39821399  | 39822648  | 1.85 | 0.0035 | 3674   |
| OR4M1     | chr14 | 19315621  | 19316676  | 1.85 | 0.0036 | 441670 |
| ZXDA      | chrX  | 57953092  | 57954351  | 1.84 | 0.0036 | 7789   |
| MAPK10    | chr4  | 87500967  | 87502127  | 1.84 | 0.0036 | 5602   |
| GLIS3     | chr9  | 4143283   | 4144844   | 1.84 | 0.0036 | 169792 |
| RNF14     | chr5  | 141324234 | 141325883 | 1.84 | 0.0036 | 9604   |
| SLCO6A1   | chr5  | 101862590 | 101863950 | 1.84 | 0.0036 | 133482 |
| GNG2      | chr14 | 51412259  | 51413508  | 1.84 | 0.0036 | 54331  |
| ABCG8     | chr2  | 43919967  | 43921016  | 1.84 | 0.0036 | 64241  |
| CAPN3     | chr15 | 40437889  | 40439244  | 1.84 | 0.0036 | 825    |
| ZDHHC21   | chr9  | 14684074  | 14685426  | 1.84 | 0.0036 | 340481 |
| KIAA0125  | chr14 | 105458956 | 105460005 | 1.84 | 0.0036 | 9834   |
| RTP1      | chr3  | 188395901 | 188396960 | 1.84 | 0.0037 | 132112 |
| SUPT16H   | chr14 | 20923602  | 20924651  | 1.84 | 0.0037 | 11198  |
| ATP4A     | chr19 | 40747000  | 40748149  | 1.84 | 0.0037 | 495    |
| SLC16A7   | chr12 | 58366692  | 58368241  | 1.84 | 0.0037 | 9194   |
| LMO2      | chr11 | 33871913  | 33872963  | 1.84 | 0.0037 | 4005   |
| ANGPTL6   | chr19 | 10075325  | 10076974  | 1.83 | 0.0037 | 83854  |
| ZNF398    | chr7  | 148473350 | 148474399 | 1.83 | 0.0037 | 57541  |
| B3GALT3   | chr3  | 162286344 | 162287493 | 1.83 | 0.0038 | 8706   |
| LOC349196 | chr8  | 7106007   | 7107059   | 1.83 | 0.0038 | 349196 |
| ADAM30    | chr1  | 120240736 | 120242386 | 1.83 | 0.0038 | 11085  |
| H2AFB3    | chrX  | 154343062 | 154344611 | 1.83 | 0.0038 | 83740  |
| CHST8     | chr19 | 38865273  | 38866322  | 1.83 | 0.0038 | 64377  |
| NME6      | chr3  | 48318452  | 48319503  | 1.83 | 0.0038 | 10201  |
| RTDR1     | chr22 | 21813241  | 21814290  | 1.83 | 0.0038 | 27156  |
| TCEAL5    | chrX  | 102419756 | 102420810 | 1.83 | 0.0038 | 340543 |
| OR2T34    | chr1  | 246805281 | 246806340 | 1.83 | 0.0039 | 127068 |
| SLC4A5    | chr2  | 74423570  | 74424620  | 1.83 | 0.0039 | 57835  |
| KIAA1920  | chr15 | 82757603  | 82758652  | 1.83 | 0.0039 | 114817 |
| BZRAP1    | chr17 | 53760477  | 53761626  | 1.83 | 0.0039 | 9256   |
| KRTAP6-3  | chr21 | 30886455  | 30887618  | 1.83 | 0.0039 | 337968 |
| EREG      | chr4  | 75448423  | 75450072  | 1.83 | 0.0039 | 2069   |
| LMLN      | chr3  | 199172367 | 199173925 | 1.83 | 0.0039 | 89782  |
| SYNE2     | chr14 | 63751528  | 63752777  | 1.83 | 0.0039 | 23224  |
| C4BPA     | chr1  | 205341529 | 205342584 | 1.83 | 0.0039 | 722    |
| PLGLB1    | chr2  | 87828420  | 87829476  | 1.83 | 0.0039 | 5343   |
| ITGAE     | chr17 | 3659578   | 3660633   | 1.83 | 0.0039 | 3682   |
| DHX9      | chr1  | 181114442 | 181116402 | 1.82 | 0.0039 | 1660   |
| ZNF609    | chr15 | 62578571  | 62579620  | 1.82 | 0.0040 | 23060  |

|           |       |           |           |      |        |        |
|-----------|-------|-----------|-----------|------|--------|--------|
| FRG2      | chr4  | 191184906 | 191185955 | 1.82 | 0.0040 | 448831 |
| CLDN14    | chr21 | 36774258  | 36775717  | 1.82 | 0.0040 | 23562  |
| ZNF447    | chr19 | 63301489  | 63302538  | 1.82 | 0.0040 | 65982  |
| GAB2      | chr11 | 77730903  | 77732252  | 1.82 | 0.0040 | 9846   |
| WIG1      | chr3  | 180272978 | 180274236 | 1.82 | 0.0040 | 64393  |
| ACOT2     | chr14 | 73103731  | 73104780  | 1.82 | 0.0040 | 10965  |
| OR51E1    | chr11 | 4627435   | 4628591   | 1.82 | 0.0040 | 143503 |
| RASL12    | chr15 | 63148841  | 63149890  | 1.82 | 0.0040 | 51285  |
| POTE14    | chr14 | 18620764  | 18621813  | 1.82 | 0.0040 | 404785 |
| DEFA1     | chr8  | 6825912   | 6826961   | 1.82 | 0.0041 | 1667   |
| CNGA4     | chr11 | 6214209   | 6215458   | 1.82 | 0.0041 | 1262   |
| DLG3      | chrX  | 69579343  | 69580392  | 1.82 | 0.0041 | 1741   |
| FCRL3     | chr1  | 155936471 | 155937820 | 1.82 | 0.0041 | 115352 |
| RAB6IP2   | chr12 | 1006675   | 1008032   | 1.82 | 0.0041 | 23085  |
| GATA2     | chr3  | 129695618 | 129696667 | 1.82 | 0.0041 | 2624   |
| OR2AT4    | chr11 | 74478906  | 74479955  | 1.82 | 0.0041 | 341152 |
| CABIN1    | chr22 | 22735664  | 22736718  | 1.82 | 0.0041 | 23523  |
| FGR       | chr1  | 27823060  | 27824116  | 1.82 | 0.0041 | 2268   |
| LILRA3    | chr19 | 59496860  | 59497914  | 1.82 | 0.0041 | 11026  |
| KIAA1727  | chr4  | 154083384 | 154084433 | 1.82 | 0.0041 | 85462  |
| PPP3R2    | chr9  | 103397821 | 103398878 | 1.82 | 0.0041 | 5535   |
| GSDMB     | chr17 | 35328429  | 35329878  | 1.82 | 0.0041 | 55876  |
| WNT5B     | chr12 | 1595982   | 1597039   | 1.81 | 0.0041 | 81029  |
| CST11     | chr20 | 23380482  | 23381531  | 1.81 | 0.0041 | 140880 |
| LRRC37A   | chr17 | 41726891  | 41728050  | 1.81 | 0.0041 | 9884   |
| BDH1      | chr3  | 198784791 | 198785850 | 1.81 | 0.0041 | 622    |
| DUX4      | chr4  | 191236762 | 191237811 | 1.81 | 0.0042 | 22947  |
| PCDHGC5   | chr5  | 140848891 | 140849940 | 1.81 | 0.0042 | 56097  |
| SCT       | chr11 | 617075    | 618524    | 1.81 | 0.0042 | 6343   |
| GSDML     | chr17 | 35326519  | 35327569  | 1.81 | 0.0042 | 55876  |
| ZNF568    | chr19 | 42099084  | 42100138  | 1.81 | 0.0042 | 374900 |
| SSR2      | chr1  | 154257851 | 154259500 | 1.81 | 0.0042 | 6746   |
| LCE1A     | chr1  | 151065672 | 151066728 | 1.81 | 0.0042 | 353131 |
| OR6C65    | chr12 | 54077879  | 54078936  | 1.81 | 0.0042 | 403282 |
| OR2M5     | chr1  | 246374072 | 246375235 | 1.81 | 0.0042 | 127059 |
| CRMP1     | chr4  | 5945886   | 5947135   | 1.81 | 0.0042 | 1400   |
| FLJ13231  | chr5  | 37248712  | 37250266  | 1.81 | 0.0042 | 65250  |
| GPR52     | chr1  | 172683745 | 172684803 | 1.81 | 0.0042 | 9293   |
| PMVK      | chr1  | 153176791 | 153177840 | 1.81 | 0.0042 | 10654  |
| VSIG9     | chr3  | 115492964 | 115494013 | 1.81 | 0.0043 | 201633 |
| DEFB106A  | chr8  | 7330152   | 7331209   | 1.81 | 0.0043 | 245909 |
| C11orf44  | chr11 | 130045360 | 130046411 | 1.81 | 0.0043 | 283171 |
| LOC644011 | chr10 | 48571500  | 48572556  | 1.81 | 0.0043 | 644011 |
| FETUB     | chr3  | 187839142 | 187840192 | 1.81 | 0.0043 | 26998  |
| ECE2      | chr3  | 185474987 | 185476039 | 1.81 | 0.0043 | 9718   |
| C11orf42  | chr11 | 6180773   | 6181922   | 1.80 | 0.0043 | 160298 |
| GMEB2     | chr20 | 61722273  | 61723325  | 1.80 | 0.0044 | 26205  |



|           |              |           |           |      |        |        |
|-----------|--------------|-----------|-----------|------|--------|--------|
| RetSat    | chr2         | 85436546  | 85437595  | 1.80 | 0.0044 | 54884  |
| BNIP1     | chr1         | 149274315 | 149275368 | 1.80 | 0.0044 | 149428 |
| KIR2DS1   | chr19_random | 256087    | 257341    | 1.80 | 0.0044 | 3806   |
| FLJ42258  | chr11        | 69182679  | 69184028  | 1.80 | 0.0044 | 440049 |
| DNAJC19   | chr3         | 182189624 | 182191375 | 1.80 | 0.0044 | 131118 |
| KCNA10    | chr1         | 110862320 | 110863469 | 1.80 | 0.0044 | 3744   |
| LOC96610  | chr22        | 20986188  | 20987243  | 1.80 | 0.0044 | 96610  |
| CUEDC1    | chr17        | 53335849  | 53336898  | 1.80 | 0.0044 | 404093 |
| KIR2DS3   | chr19_random | 239623    | 240676    | 1.80 | 0.0044 | 3808   |
| LRRC32    | chr11        | 76060043  | 76061092  | 1.80 | 0.0044 | 2615   |
| CTGLF1    | chr10        | 45663227  | 45664576  | 1.80 | 0.0044 | 119016 |
| OR6K2     | chr1         | 156936066 | 156937115 | 1.80 | 0.0044 | 81448  |
| DMRTC1    | chrX         | 72080743  | 72081792  | 1.80 | 0.0044 | 63947  |
| LOC196913 | chr14        | 49629111  | 49630469  | 1.80 | 0.0044 | 196913 |
| OR5P3     | chr11        | 7803095   | 7804550   | 1.80 | 0.0044 | 120066 |
| ELA3A     | chr1         | 22198435  | 22199486  | 1.80 | 0.0045 | 10136  |
| LOC285527 | chr4         | 48351716  | 48352873  | 1.80 | 0.0045 | 285527 |
| SLC9A8    | chr20        | 47861256  | 47862308  | 1.80 | 0.0045 | 23315  |
| TNFRSF13B | chr17        | 16816827  | 16817876  | 1.80 | 0.0045 | 23495  |
| PTPRT     | chr20        | 41252889  | 41254538  | 1.80 | 0.0045 | 11122  |
| PI3       | chr20        | 43235411  | 43236462  | 1.80 | 0.0045 | 5266   |
| OVOL1     | chr11        | 65308704  | 65309853  | 1.80 | 0.0045 | 5017   |
| OR1B1     | chr9         | 124431335 | 124432386 | 1.80 | 0.0045 | 347169 |
| FLJ10324  | chr7         | 4890843   | 4892192   | 1.80 | 0.0045 | 55698  |
| OR2M3     | chr1         | 246432692 | 246433741 | 1.80 | 0.0045 | 127062 |
| ZNF577    | chr19        | 57082009  | 57083063  | 1.80 | 0.0045 | 84765  |
| GZMH      | chr14        | 24147804  | 24148857  | 1.80 | 0.0046 | 2999   |
| SYT13     | chr11        | 45265183  | 45266332  | 1.80 | 0.0046 | 57586  |
| CABP5     | chr19        | 53240438  | 53241590  | 1.79 | 0.0046 | 56344  |
| SIRPG     | chr20        | 1586802   | 1587951   | 1.79 | 0.0046 | 55423  |
| PRH1      | chr12        | 10928319  | 10929370  | 1.79 | 0.0046 | 5554   |
| CARD6     | chr5         | 40874842  | 40875903  | 1.79 | 0.0046 | 84674  |
| AFF3      | chr2         | 100089879 | 100091132 | 1.79 | 0.0046 | 3899   |
| LOC51149  | chr5         | 179219767 | 179220827 | 1.79 | 0.0046 | 51149  |
| THEM5     | chr1         | 150092597 | 150093648 | 1.79 | 0.0046 | 284486 |
| HK1       | chr10        | 70698864  | 70700313  | 1.79 | 0.0046 | 3098   |
| MSRA      | chr8         | 9946835   | 9947985   | 1.79 | 0.0046 | 4482   |
| C17orf77  | chr17        | 70090151  | 70091400  | 1.79 | 0.0046 | 146723 |
| UNQ3033   | chr19        | 59259846  | 59261095  | 1.79 | 0.0046 | 284415 |
| HTR3E     | chr3         | 185300560 | 185301609 | 1.79 | 0.0046 | 285242 |
| PSCD1     | chr17        | 74290971  | 74292431  | 1.79 | 0.0046 | 9267   |
| CARD14    | chr17        | 75764375  | 75765425  | 1.79 | 0.0046 | 79092  |
| CES1      | chr16        | 54425276  | 54426325  | 1.79 | 0.0047 | 1066   |
| SPOCK2    | chr10        | 73519690  | 73520739  | 1.79 | 0.0047 | 9806   |
| C9orf24   | chr9         | 34388649  | 34389698  | 1.79 | 0.0047 | 84688  |
| PAGE2B    | chrX         | 55116728  | 55117884  | 1.79 | 0.0047 | 389860 |
| GRAP      | chr17        | 18892061  | 18893111  | 1.79 | 0.0047 | 10750  |

|           |             |           |           |      |        |        |
|-----------|-------------|-----------|-----------|------|--------|--------|
| CASC1     | chr12       | 25238282  | 25239436  | 1.79 | 0.0047 | 55259  |
| DPRX      | chr19       | 58826521  | 58827570  | 1.79 | 0.0047 | 503834 |
| FAM90A1   | chr12       | 8272664   | 8274113   | 1.79 | 0.0047 | 55138  |
| C9orf48   | chr9        | 34252609  | 34253658  | 1.79 | 0.0047 | 347240 |
| FLJ45139  | chr21       | 39231323  | 39232784  | 1.79 | 0.0047 | 400867 |
| LCN1      | chr9        | 137551806 | 137553155 | 1.79 | 0.0047 | 3933   |
| CD86      | chr3        | 123279139 | 123280389 | 1.79 | 0.0047 | 942    |
| SSX2      | chrX        | 52753074  | 52754127  | 1.79 | 0.0047 | 6757   |
| LOC286016 | chr7        | 128483934 | 128484983 | 1.79 | 0.0047 | 286016 |
| CBLN1     | chr16       | 47883029  | 47884290  | 1.79 | 0.0047 | 869    |
| FLJ36840  | chr7_random | 222017    | 223077    | 1.79 | 0.0047 | 645524 |
| DNAH9     | chr17       | 11724343  | 11725392  | 1.79 | 0.0047 | 1770   |
| AGTR1     | chr3        | 149929303 | 149930659 | 1.79 | 0.0047 | 185    |
| FAM71B    | chr5        | 156526856 | 156527910 | 1.79 | 0.0047 | 153745 |
| OR10X1    | chr1        | 156815313 | 156816362 | 1.79 | 0.0047 | 128367 |
| LOC441426 | chr9        | 43125007  | 43126069  | 1.79 | 0.0047 | 441426 |
| KCNA6     | chr12       | 4785902   | 4786959   | 1.79 | 0.0047 | 3742   |
| OR52E5    | chr11       | 5876582   | 5877738   | 1.79 | 0.0047 | 390082 |
| FGD5      | chr3        | 14834409  | 14835558  | 1.79 | 0.0047 | 152273 |
| UROC1     | chr3        | 127720484 | 127721933 | 1.79 | 0.0048 | 131669 |
| LOC440295 | chr15       | 80509942  | 80510991  | 1.79 | 0.0048 | 440295 |
| USH2A     | chr1        | 214663361 | 214664510 | 1.79 | 0.0048 | 7399   |
| GNL3L     | chrX        | 54570866  | 54572215  | 1.78 | 0.0048 | 54552  |
| DYNLT1    | chr6        | 158986331 | 158987480 | 1.78 | 0.0048 | 6993   |
| FLJ46020  | chr21       | 34242099  | 34243148  | 1.78 | 0.0048 | 400863 |
| C14orf139 | chr14       | 94947510  | 94948659  | 1.78 | 0.0048 | 79686  |
| KIAA1026  | chr1        | 15126182  | 15127731  | 1.78 | 0.0049 | 23254  |
| C1QTNF3   | chr5        | 34080674  | 34081732  | 1.78 | 0.0049 | 114899 |
| HNF4A     | chr20       | 42416284  | 42418033  | 1.78 | 0.0049 | 3172   |
| LOC257358 | chr5        | 169692067 | 169693116 | 1.78 | 0.0049 | 257358 |
| MGC48595  | chr14       | 73094604  | 73096060  | 1.78 | 0.0049 | 399671 |
| LOC148696 | chr1        | 206057546 | 206059145 | 1.78 | 0.0049 | 148696 |
| FLJ45831  | chr17       | 14638125  | 14639278  | 1.78 | 0.0049 | 400576 |
| PKD2L1    | chr10       | 102080733 | 102081787 | 1.78 | 0.0049 | 9033   |
| KRTAP13-1 | chr21       | 30689312  | 30690570  | 1.78 | 0.0049 | 140258 |
| HSD3B1    | chr1        | 119849873 | 119850922 | 1.78 | 0.0049 | 3283   |
| LOC286526 | chrX        | 102077755 | 102078804 | 1.78 | 0.0049 | 286526 |
| KRTAP5-4  | chr11       | 1598944   | 1599993   | 1.78 | 0.0049 | 387267 |
| ASAP      | chr4        | 156519091 | 156520148 | 1.78 | 0.0049 | 79884  |
| FBXL12    | chr19       | 9791631   | 9792680   | 1.78 | 0.0050 | 54850  |
| DEFA1     | chr8        | 6824312   | 6825361   | 1.78 | 0.0050 | 1667   |
| MYO1D     | chr17       | 28229616  | 28230674  | 1.78 | 0.0050 | 4642   |
| HLA-G     | chr6        | 29900996  | 29902145  | 1.78 | 0.0050 | 3135   |
| SLC6A18   | chr5        | 1277569   | 1278618   | 1.78 | 0.0050 | 348932 |
| POMC      | chr2        | 25245759  | 25246808  | 1.78 | 0.0050 | 5443   |
| GPR21     | chr9        | 124836568 | 124837623 | 1.78 | 0.0050 | 2844   |
| ABCD2     | chr12       | 38301059  | 38302119  | 1.78 | 0.0050 | 225    |

**Table S2. Gene set enrichment analysis for Notch3 CHIP targets in NOTCH-regulated transcriptome**

| <b>Exp Condition</b> | <b>P-value (down-regulated)</b> | <b>P-value (up-regulated)</b> |
|----------------------|---------------------------------|-------------------------------|
| OVCAR3 24 hr         | 0.185                           | <b>0.028</b>                  |
| OVCAR3 48 hr         | <b>0.047</b>                    | 0.399                         |
| MCF7 24 hr           | 0.784                           | 0.666                         |
| MCF7 48 hr           | 0.656                           | 0.110                         |

**Table S3. Genes Identified by ChIP-on-chip and cDNA Microarray in OVCAR3**

| SYMBOL   | GENE ID | PEAK_SCORE | MRK-003/DMSO | # OF CSL MOTIF | # OF NEW MOTIF |
|----------|---------|------------|--------------|----------------|----------------|
| DLGAP5   | 9787    | 3.55       | 0.51         | 6              | 2              |
| KIAA1279 | 26128   | 2.66       | 0.64         | 7              | 5              |
| FOXD4    | 2298    | 2.36       | 0.62         | 3              | 3              |
| TTC5     | 91875   | 2.18       | 0.62         | 3              | 4              |
| FOXD4L1  | 200350  | 2.15       | 0.66         | 4              | 4              |
| EHF      | 26298   | 2.12       | 0.61         | 7              | 1              |
| NCOA5    | 57727   | 2.07       | 0.61         | 3              | 0              |
| NRAS     | 4893    | 2.05       | 0.65         | 3              | 2              |
| ITPR2    | 3709    | 2.02       | 0.59         | 3              | 0              |
| KCNAB1   | 7881    | 1.92       | 0.66         | 0              | 2              |
| ZNF679   | 168417  | 1.91       | 0.61         | 5              | 1              |
| FKSG30   | 440915  | 1.87       | 0.65         | n/a            | n/a            |
| DTNA     | 1837    | 1.85       | 0.65         | 6              | 2              |
| FAM104B  | 90736   | 1.85       | 0.57         | n/a            | n/a            |
| RNF14    | 9604    | 1.84       | 0.61         | 6              | 5              |
| GNG2     | 54331   | 1.84       | 0.61         | 4              | 2              |
| PMVK     | 10654   | 1.81       | 0.62         | 3              | 0              |
| DNAJC19  | 131118  | 1.80       | 0.59         | 1              | 3              |
| PRH1     | 5554    | 1.79       | 0.65         | 3              | 3              |
| IFP38    | 83880   | 2.59       | 1.53         | n/a            | n/a            |
| NBPF10   | 440673  | 2.53       | 1.70         | 2              | 3              |
| NBPF20   | 400818  | 2.45       | 1.58         | 5              | 2              |
| SCYL1    | 57410   | 2.27       | 1.64         | 3              | 0              |
| PITPNM1  | 9600    | 2.10       | 1.73         | 7              | 2              |
| LOC44034 | 440348  | 2.03       | 1.59         | n/a            | n/a            |
| GOLT1A   | 127845  | 2.01       | 1.67         | 6              | 3              |
| SEMA4G   | 57715   | 1.96       | 1.59         | 2              | 3              |
| SELV     | 348303  | 1.87       | 1.51         | n/a            | n/a            |
| P2RY6    | 5031    | 1.85       | 1.63         | 4              | 1              |
| ACOT2    | 10965   | 1.82       | 1.53         | 2              | 1              |
| GSDMB    | 55876   | 1.82       | 1.59         | n/a            | n/a            |
| SPOCK2   | 9806    | 1.79       | 2.78         | 5              | 2              |
| KIAA1026 | 23254   | 1.78       | 1.52         | 1              | 1              |

**Table S4. PCR primers for this study**

|                        | <b>Gene Symbol</b>    | <b>Forward Primer</b>     | <b>Reverse Primer</b>       |
|------------------------|-----------------------|---------------------------|-----------------------------|
| Quantitative<br>RT-PCR | NOTCH3                | GTGTGTGTC AATGGCTGGAC     | GTGACACAGGAGGCCAGTCT        |
|                        | DLGAP5                | GATCTGGATGGATTTTGGGA      | TTATTGACTTGCCACCCAGA        |
|                        | TTC5                  | TGGAGTGGCCGGGAGATGAT      | GCTGATCCACGAGTTCCTGCAATT    |
|                        | EHF                   | TATTGGATTTCCACCCAGA       | CTGGTGAAGGAGGTTGTTGC        |
|                        | KIAA1279              | TCTTCAGGAAGAAAACGCTCA     | TGAAACTGCACAGGCTTACCT       |
|                        | APP                   | TGAATAATTGGGTTTGT TTTTGT  | TACAACCTACCTTCTCTCCCTT      |
|                        | HEY1                  | TGGATCACCTGAAAATGCTG      | CGAAATCCCAAACCTCCGATA       |
|                        | IGFBP3                | CTCTGCGTCAACGCTAGTGC      | CGGTCTTCTCCGACTCAC          |
|                        | PARM1                 | GGCACCAAATACCAGGCTAC      | CAAAGGAGCTGATGTAGGCA        |
|                        | CCNA1                 | GCTAGGGCTGCTAACTGCAA      | GGAAGGCATTTTCTGATCCA        |
|                        | HES1                  | CGGACATTCTGGAATGACA       | GTGCGCACCTCGGTATTAAC        |
| ChIP-qPCR              | DLGAP5 (-1862 region) | AGCATGTGAAACAAGTGAACT     | TCTAAC TTTGTAAGGAATTGCCAAGC |
|                        | DLGAP5 (-2354 region) | GGGTACAGTGGTGCGATCAT      | CGCACATCTCTAGTCCCACT        |
|                        | DLGAP5 (+496 region)  | GGGGCGTAATTGACCTTTG       | CCTCCAGCTTGAAAGTCCAG        |
|                        | PIN1                  | AGTTGCACCCTTTGCTGT CAGTGT | GGAGGTATTTGGGGACCCAGAGTT    |
|                        | CASC2                 | GCCTCTTCACTGACCGAAAGGAAA  | TGGGTGGGGATGTCATTTTCA       |
|                        | L3MBTL2               | CATCCCAGCAAAAGGGCACCTTAA  | GTTCCAGACTCCAGGAATAACCTCG   |
|                        | TMF1                  | ACGTGCTAAAAGCTTGACCTTGC   | GGCTAAGAGAAGTGTGAGGCCCAAT   |
|                        | KIAA1279              | CCGGGAGGGTTATATTGGTT      | TGGAATTTCTCGCAGACCTC        |
|                        | YWHAQ                 | GGCTGAGGGGAGTTGGTAAC      | CTAGGAGGGTGGGTCGGTA         |
|                        | UVRAG                 | TTCTTTTCAATCCCTGCACGC     | TCGCTTGTCTGCCTTGGCAG        |
|                        | SLC7A4                | TTCTGGTGGTTTGTCTTCACTGC   | GAGTGAGACAGCTACACA          |
|                        | TTC5                  | GCTGCACCCTCGAGGGTTGTTA    | CCGTGAATTCCTCGGCACACA       |
